# Supplementary material
Source: PubMed Central journal article supplement (PMC3864625)
Supplement: NIHMS533266-supplement-Figure_S1-S7_Table_S1.pdf [file NIHMS533266-supplement-Figure_S1-S7_Table_S1.pdf]

## **Supporting information**

### ***Trypanosoma brucei* harbors a divergent XPB helicase paralog that is specialized in nucleotide excision repair and conserved among kinetoplastid organisms**

*Nitika Badjatia,<sup>1</sup> Tu N Nguyen,<sup>1</sup> Ju Huck Lee,<sup>1,2</sup> and Arthur Günzl<sup>1,#</sup>*

<sup>1</sup> Department of Genetics and Developmental Biology, University of Connecticut Health Center, 400 Farmington Avenue, Farmington, CT 06030-6403, USA

<sup>2</sup> Current address: Department of Microbiology & Molecular Genetics, University of Texas-Houston Medical School, 6431 Fannin Street, Houston, TX 77030, USA

# For correspondence, Email: [gunzl@uchc.edu](mailto:gunzl@uchc.edu); Tel: (860) 679-8878; Fax: (860) 679-8345.

#### **Content**

**Fig. S1.** Multiple sequence alignment of XPB amino acid sequences

**Fig. S2.** *XPB-R* is not essential for trypanosome proliferation in culture

**Fig. S3.** *XPB-R* knockout appears to affect completion of mitosis

**Fig. S4.** PTP tagging and tandem affinity purification (TAP) of XPB-R

**Fig. S5.** XPB-R-PTP co-localizes with p52-HA outside putative *SLRNA* expression foci in the nucleus

**Fig. S6.** Divergent *XPB* paralogs are present in several protistan taxa

#### *Method of Phylogenetic Analysis*

**Fig. S7.** XPB-derived phylogenetic tree with the archaeon *Sulfolobus solfataricus* as an outgroup

**Table S1.** Oligonucleotide used in this study

**Supplemental References**

CLUSTAL O(1.1.0) multiple sequence alignment

```

Hs      MGKRD-----RADRDKKKSRKRHYEDE-----E-DDEEDAPG-----
Mm      MGKRD-----RVDRDKKKSKKROYEEE-----E-EDEDDIPG-----
Drer    MGRKD-----KSDREKK-SKKRYEDE-----E-EDEEVIG-----
Dm      MGPPKRSRKRDRSGGDKFG-KKRRAEDEAFTQ-----I-VDDNDSL-----
Ce      MATKERKRR-----GKWD-----TYKA-----E-EAPSLYSG-NA-----
Sc      MTDVEGYQSKSKGKIFPDMGESFF---SSDESP-----ATDAEI-DENYDDNRETL---EGRGE-RDTGAMVT-GL-----KKP
Sp      M-----SLKRRMN-----AR-EGTDPEDLEEYSY-SDVDNYGE-EDDDSYKP-AP-----
Ca      M-----SSRNREP-----VNYADLEDEFSDVYVSNKGTAKD-NDDDEYNT-PS-----OKS
Nc      MPPKRAVGAQAGVAKAGRTSALSTPGP-----ATPFRSL-----SSFQS--DGDDD-LNDDVDVE-VI-----KRR

Tb-1
Tco-1
Tv-1
Tc-1
Lm-1
Li-1
Lb-1
Lmx-1
Bs-1

Tb-R
Tco-2
Tv-2*
Tc-2
Lm-2
Li-2
Lb-2
Lmx-2
Bs-2

Ng-1    MNNS--Q-----O-EETNQTOHS-----NPNPTNEKNE-----KKR
Ng-2    MLNNH--L-----HDQTTG-----TSSNRLQSED-----KKR
Trva-1  MS-----DAEYHEN-----LKN-LDVGH-----SRNRK
Trva-2  MT-----EEELDDF-----KEEQTTQNL-----VKKRRT
Gl
Ehis-1
Ehis-2
Edis-1
Edis-2
Dd      MSSGDSNL-----KRRRGNT-QSSSKSYNTWTDYEE-----D-LEE-----
Ac**
Pf      MMN-SLKDSSNYSPNLSHTRGSRKRS-D-IFNENYAKNLKRRKLAAKKL
Toxg    MEPGAFPCSGTFSSEARSFFRASSPPAAKRFRFR-SEPDEDEDWPDTCLYEASQADRESRASRTWPAQVPRVAPPVALRV
Eimt**
Ta
Tett-1  MSV-----PVQYIA-----DYSNTPEA-----RL
Tett-2
Part-1
Part-2
At-1    MGNGERGRPNKKMKYGGKD-DQMKMNIQNAEDYYD-----D-ADE-----
At-2    MGNDERKRPKKMKYGGKD-DQMKMNIQNVEDYYD-----D-ADE-----
Orys-1  MAGGDGDRARAPKRHKSSA--PSRSIDETAELDYD-----D-VDD-----
Orys-2  MAGGDGDRARAPKRHKSSA--PSRSIDETAELDYD-----D-VDD-----

Hs      -----NDPOEAVPS-----AAGKQ--VDESGTK-VDEY----GAKDYRLQMLPKDDHTSRPLWVAP-D--
Mm      -----NESQAEVPS-----AAGKQ--VDESSTK-VDEY----GAKDYRQOMLPKGDHTSRPLWVAP-D-
Drer    -----GESQAEVPA-----AAGKQ--VDESSTK-LDEY----GAKDYRLOMLLKNHSSRPLWVAP-D-
Dm      -----ATESEGIPG-----AASKN-AETNDEQIN-TDEY----GAKDYRSQMOQLRDPHGNRPLWVAP-N-
Ce      -----DKETSSVPK-----AASHNLNGENASSVM-TDEF----GAKDYRKDMLPKGDFSTARPLWVAP-D-
Sc      RKKT-K-SSRHT---AADS---SMNQMDAKDKALLQDTSNDIPADFVPSV-SGMF---RSHDFSY-LRLRPDHASRPLWISPSD
Sp      RIRI---NNNKTKAQT-----TTNSNEARQSGI-SAMF----GQNDFSNLLGLKLDHTARPLWINPID
Ca      RKST-GNNSKKRKAQESVDSLKQNLDETNYN-DNELIELTPDVPADYIPDAV-SKNF---GKGDFSY-LKLPKDPHTSRPLWISPD
Nc      EE-----VIAREADEFVNTWA-----VDSRRFQA--RQDGGGSHRDGA-TQFFG--SGKRDFSY-LNLKPDHDKQPLWIDPEK--

Tb-1
Tco-1
Tv-1
Tc-1
Lm-1
Li-1
Lb-1
Lmx-1
Bs-1

Tb-R
Tco-2
Tv-2*
Tc-2
Lm-2
Li-2
Lb-2
Lmx-2
Bs-2

Ng-1    RKSETKSKNKKTKYDN-----IENDTDSQISK-OAEKLA-TDIFKQKEGIFQFDH-SSMDLKSDESRIPIWVCSGD--
Ng-2    KKKEKEAKKKKQKYEE-----ILNDLDNEVAKKAQEKLV-SDIFSQKKDVOFDH-SNLELKPDKLRLPVWVCSGT-
Trva-1  RKSEN-----KIKLEN-----EVSKSFDDLTETPGSENRPALVFP-D-
Trva-2  RSHAP---KQKLLQ-----LEANYFDGETRARS-----NKYKFKLDLYLENSDNRPALVFP-D-
Gl      -----MSKDAPIFSFEDLKPDKHKKRPLSVFPYSTN
Ehis-1  -----MHKK-----RDTSDSS--DDSLE--DMKESTDYDMRLKPNHPELPMWVSS-N-
Ehis-2  -----MHKK-----RDTSDSS--MK-STIE--N--DDSEEKFLQIINTSNPWVICS-N-
Edis-1  -----MHKK-----RDTSDSS--EDSLE--DMKESTDYDMRLKPNHPELPMWVSS-N-
Edis-2  -----MHKK-----RDTSDSS--MK-SNIE--NNNDELEEYVNIETINTSNPWVICS-N-
Dd      -----SGEFNQSIKKTNTTSSATLT--SSEK--GSLLDYSKRCILKQDNKSRPIWVCP-D-
Ac**
Pf      KDSTNGEFTKKVK-KQ-----LKDY--YEM---RFDKVINLFPFS-TDSINIQORGFHDYSKDMKLNKHNHMKPLWICS-D-
Toxg    R--EEGMAEKSAGTK-----DARP--SET---AQGGVYGSPLPT-ADSLSLGVGGRFDGSKLAKVDDHARRPLWVCP-D-
Eimt**
Ta      -----MSK--KSI---LVENTWGSLLPFT-IDGSEQWIRNFRDYS-NLKLKTNHTARPLWVCP-D-
Tett-1  KS-----NSOKQONQ--G-----KQORNEEGDGLGQKQGAQVEGN--QFQFYDYS-TLELKDDYRERPLILCP-D-
Tett-2  KK-----NHQRY-----CLYLKPADRDYSSSSET--QENRGFFPE-T-
Part-1  -----MSFEVKKRKLQTOPPEVQKLLIGDNMDYR-NIET--VQSNKPLTLSP-D-
Part-2  -----MRIDEFO-----EQQLK-KTNSNDFQWK-K-
At-1    -----DSR-----DGECE--EKRRDF-TKLELKPDKHGNRPLWACA-D-
At-2    -----DSR-----DGECE--EKRRDF-TDLELKPDKHGNRPLWACA-D-
Orys-1  -----DVR-----DADRE--VKKRDF-TKLELKPDKHGNRPLWACA-D-
Orys-2  -----DVR-----DADRE--VKKRDF-TKLELKPDKHGNRPLWACA-D-

```

XPB domain  
\*\*\*\*\*

\*\* \*\*\*\*\*

|        |                            |                                         |
|--------|----------------------------|-----------------------------------------|
| Hs     | -----GHLEFLVLESPV-----     | YK-VAODFLVAIAEIPVCRPPEHHEHYKLTAYSLYAAYS |
| Mm     | -----GHLEFLVLESPV-----     | YK-VAODFLVAIAEIPVCRPPEHHEHYKLTAYSLYAAYS |
| Drer   | -----GHLEFLVLESPV-----     | YK-VAODFLVAIAEIPVCRPPEHHEHYKLTAYSLYAAYS |
| Dm     | -----GHLEFLVLESPV-----     | YK-VAODFLVAIAEIPVCRPPEHHEHYKLTAYSLYAAYS |
| Ce     | -----GHLEFLVLESPV-----     | YK-VAODFLVAIAEIPVCRPPEHHEHYKLTAYSLYAAYS |
| Sc     | -----GHLEFLVLESPV-----     | YK-VAODFLVAIAEIPVCRPPEHHEHYKLTAYSLYAAYS |
| Sp     | -----GHLEFLVLESPV-----     | YK-VAODFLVAIAEIPVCRPPEHHEHYKLTAYSLYAAYS |
| Ca     | -----GHLEFLVLESPV-----     | YK-VAODFLVAIAEIPVCRPPEHHEHYKLTAYSLYAAYS |
| Nc     | -----GHLEFLVLESPV-----     | YK-VAODFLVAIAEIPVCRPPEHHEHYKLTAYSLYAAYS |
| Tb-1   | -----GRLEIIVHCFPA-----     | YV-ILMDFLVAIAEIPVCRPPEHHEHYKLTAYSLYAAYS |
| Tco-1  | -----GTLLVIVHSRPA-----     | YV-ILMDFLVAIAEIPVCRPPEHHEHYKLTAYSLYAAYS |
| Tv-1   | -----GSIVVRHAPPA-----      | YV-ILMDFLVAIAEIPVCRPPEHHEHYKLTAYSLYAAYS |
| Tc-1   | -----GSIVVNRHAPPA-----     | YV-ILMDFLVAIAEIPVCRPPEHHEHYKLTAYSLYAAYS |
| Lm-1   | -----GNLEVEKAPPA-----      | YV-ILMDFLVAIAEIPVCRPPEHHEHYKLTAYSLYAAYS |
| Li-1   | -----GNLEVEKAPPA-----      | YV-ILMDFLVAIAEIPVCRPPEHHEHYKLTAYSLYAAYS |
| Lb-1   | -----GNLEVEKAPPA-----      | YV-ILMDFLVAIAEIPVCRPPEHHEHYKLTAYSLYAAYS |
| Lmx-1  | -----GNLEVEKAPPA-----      | YV-ILMDFLVAIAEIPVCRPPEHHEHYKLTAYSLYAAYS |
| Bs-1   | -----GRLEVEVHCFEE-----     | YV-ILMDFLVAIAEIPVCRPPEHHEHYKLTAYSLYAAYS |
| Tb-R   | -----ECCVVMIAEERFPA-----   | YV-ILMDFLVAIAEIPVCRPPEHHEHYKLTAYSLYAAYS |
| Tco-2  | -----ECCVVMIAEERFPA-----   | YV-ILMDFLVAIAEIPVCRPPEHHEHYKLTAYSLYAAYS |
| Tv-2*  | -----EDCIVVIAEERFPA-----   | YV-ILMDFLVAIAEIPVCRPPEHHEHYKLTAYSLYAAYS |
| Tc-2*  | -----EYVVMIAEERFPA-----    | YV-ILMDFLVAIAEIPVCRPPEHHEHYKLTAYSLYAAYS |
| Lm-2   | -----DYIIVHIAESFRS-----    | YV-ILMDFLVAIAEIPVCRPPEHHEHYKLTAYSLYAAYS |
| Li-2   | -----DYIIVHIAESFRS-----    | YV-ILMDFLVAIAEIPVCRPPEHHEHYKLTAYSLYAAYS |
| Lb-2   | -----DYIIVHIAESFRS-----    | YV-ILMDFLVAIAEIPVCRPPEHHEHYKLTAYSLYAAYS |
| Lmx-2  | -----DYIIVHIAESFRS-----    | YV-ILMDFLVAIAEIPVCRPPEHHEHYKLTAYSLYAAYS |
| Bs-2   | -----AGHISIVVIAEERFPA----- | YV-ILMDFLVAIAEIPVCRPPEHHEHYKLTAYSLYAAYS |
| Ng-1   | -----NGDYHIFMETNTPV-----   | YQ-QAYDFLVAIAEIPVCRPPEHHEHYKLTAYSLYAAYS |
| Ng-2   | -----DGKFLHIFMETNTPV-----  | YQ-QAYDFLVAIAEIPVCRPPEHHEHYKLTAYSLYAAYS |
| Trva-1 | -----GHIFLETSPF-----       | YS-KTVDFLVAIAEIPVCRPPEHHEHYKLTAYSLYAAYS |
| Trva-2 | -----GHIFLETSPF-----       | YS-KTVDFLVAIAEIPVCRPPEHHEHYKLTAYSLYAAYS |
| Gl     | ALSADHVVLLETSPM-----       | YD-EAYNFLVSLAEATRPTVYVHEYRITELSHLIGLS   |
| Ehis-1 | -----LRIVVETSNDM-----      | FK-EVSDYLSRVAQVKSREHMEHYQLTPTSIMTAFS    |
| Ehis-2 | -----GLIIIERDNKN-----      | YQ-IASEFKKISKVKLLEHMEHYIITEYTIYSALS     |
| Edis-1 | -----LRIVVETSNDM-----      | FK-EVSDYLSRVAQVKSREHMEHYQLTPTSIMTAFS    |
| Edis-2 | -----GLIIIERDNKN-----      | YQ-IASEFKKISKVKLLEHMEHYIITEYTIYSALS     |
| Dd     | -----GHIFLETSAI-----       | YK-QASDFLVAIAEIPVCRPPEHHEHYKLTAYSLYAAYS |
| Ac**   | -----GFIYLEMFNSC-----      | SK-QASDFLVAIAEIPVCRPPEHHEHYKLTAYSLYAAYS |
| Pf     | -----GTILLETFSAA-----      | NR-QATELLTMAEIPVCRPPEHHEHYKLTAYSLYAAYS  |
| Toxg   | -----GFIYLEMFNSC-----      | SK-QASDFLVAIAEIPVCRPPEHHEHYKLTAYSLYAAYS |
| Eimt** | -----GTILLETFSAA-----      | NR-QATELLTMAEIPVCRPPEHHEHYKLTAYSLYAAYS  |
| Ta     | -----GYLYLELFTPV-----      | SK-QALDFVITIAEIPVCRPPEHHEHYKLTAYSLYAAYS |
| Tett-1 | -----GIIFLETNPL-----       | YR-VAYQFLISIGEPVORPLSMHKEFTLTKYSLYTAMV  |
| Tett-2 | -----LYIFVEAFHEK-----      | YK-EVYEFLLKIAEIPVCRPPEHHEHYKLTAYSLYAAYS |
| Part-1 | -----LGIIVKEFNPL-----      | YE-IAFEFLMCVAEPIRSSELIHEYVLTOMSMYTAMV   |
| Part-2 | -----YEIILEKPHRD-----      | AA-AAEETLQFAEPPSSTTTNIOTFIITFYSLYTAMT   |
| At-1   | -----GRIFLETSPPL-----      | YK-QAYDFLVAIAEIPVCRPPEHHEHYKLTAYSLYAAYS |
| At-2   | -----GKIFLETSPPL-----      | YK-QAYDFLVAIAEIPVCRPPEHHEHYKLTAYSLYAAYS |
| Orys-1 | -----GRIFLETSPPL-----      | YK-QAYDFLVAIAEIPVCRPPEHHEHYKLTAYSLYAAYS |
| Orys-2 | -----GRIFLETSPPL-----      | YK-QAYDFLVAIAEIPVCRPPEHHEHYKLTAYSLYAAYS |

\*\*\*\*\*

|        |                                         |                                       |                                                   |
|--------|-----------------------------------------|---------------------------------------|---------------------------------------------------|
| Hs     | VGLQSDITEYLRKLSKT-----                  | GVPDGIQFIKLCITVSYGKVKL-----           | VLKHNRYFVESCH                                     |
| Mm     | VGLQSDITEYLRKLSKT-----                  | GVPDGIQFIKLCITVSYGKVKL-----           | VLKHNRYFVESCH                                     |
| Drer   | VGLQSDITEYLRKLSKT-----                  | GVPDGIQFIKLCITVSYGKVKL-----           | VLKHNRYFVESCH                                     |
| Dm     | VGLQSDITEYLRKLSKT-----                  | GVPDGIQFIKLCITVSYGKVKL-----           | VLKHNRYFVESCH                                     |
| Ce     | VGLQSDITEYLRKLSKT-----                  | GVPDGIQFIKLCITVSYGKVKL-----           | VLKHNRYFVESCH                                     |
| Sc     | VGLQSDITEYLRKLSKT-----                  | GVPDGIQFIKLCITVSYGKVKL-----           | VLKHNRYFVESCH                                     |
| Sp     | VGLQSDITEYLRKLSKT-----                  | GVPDGIQFIKLCITVSYGKVKL-----           | VLKHNRYFVESCH                                     |
| Ca     | VGLQSDITEYLRKLSKT-----                  | GVPDGIQFIKLCITVSYGKVKL-----           | VLKHNRYFVESCH                                     |
| Nc     | VGLQSDITEYLRKLSKT-----                  | GVPDGIQFIKLCITVSYGKVKL-----           | VLKHNRYFVESCH                                     |
| Tb-1   | ECTYSMEMVRNVIRYFRIDEO-----              | QOIPVDVRYAALERRVRDSVODTSLIDLPMEV----- | -----GEAKVSANG                                    |
| Tco-1  | ECTYSVMGMRNVIRYFRIDEO-----              | ORLPVDIARVNRLEOKVWNLONSTAEALFE-----   | -----TD-----DADG                                  |
| Tv-1   | ECTYSVMIRNVIRYFRIDAK-----               | FRLEPVDIVKYVELQORVODGSDASIGLGD-----   | -----EDRVYMG                                      |
| Tc-1   | ECTYSVMIRNVIRYFRIDEO-----               | HRLPVDLAKLSALERQLENCEV-----           | -----AMGT                                         |
| Lm-1   | ECTYSLAMIENVRHFRNLAA-----               | OELPVDLERCAALERLASALDES-----          | -----TESAEVDDGSRVSOEALATTTASSSFADARIPLPRCLCDVLTG  |
| Li-1   | ECTYSLAMIENVRHFRNLAA-----               | OELPVDLERCAALERLASALDES-----          | -----NGSAEVDGFRTSOEAALATKTASSSFADARIPLPRCLSDVDLTG |
| Lb-1   | ECTYSLAMIENVRHFRNLAA-----               | OELPVDLERCAALERLASALDES-----          | -----NESAEVDGLWASQAAVATKASSFAVHTPLPRCLSDVDLTG     |
| Lmx-1  | ECTYSLAMIENVRHFRNLAA-----               | OELPVDLERCAALERLASALDES-----          | -----SEGAEVDVRSRSTQAEAMATKPTSSSSFAARIPLPRCLCDVLTG |
| Bs-1   | ECSYVGEDVRELLRRSEDCD-----               | ARLPAAVDD-----                        | -----                                             |
| Tb-R   | ASISVSEVIOFDDHVYFFRDKCFASYRESVCA-----   | AEYMSRCNLAIV-----                     | -----VLDERTLLECKD                                 |
| Tco-2  | ADISAAEVVIOFSEHVYFFNEEHFRPHRNRVEL-----  | FAERCMSRYNLAIV-----                   | -----VLDERTLLECKD                                 |
| Tv-2*  | ANISAAEVVIOFDNYVYFFCDESLVEKRRKRVCA----- | VEYMSRYNLAIV-----                     | -----VLDERTLLECKD                                 |
| Tc-2*  | ASIPVSDVICFDDEYVYGFCDGEGNSRRARVCA-----  | LEMCMRYNLAIV-----                     | -----VLDERTLLECKD                                 |
| Lm-2   | NCIDAAEATAFETHYVGLAESS-----             | ERRQVROFIESCMRYNLAIV-----             | -----VLDERTLLECKD                                 |
| Li-2   | NCIDAAEATAFETHYVGLAESS-----             | ERRQVROFIESCMRYNLAIV-----             | -----VLDERTLLECKD                                 |
| Lb-2   | NCIDAAEATAFETHYVGLAESS-----             | ERRQVROFIESCMRYNLAIV-----             | -----VLDERTLLECKD                                 |
| Lmx-2  | NCIDAAEATAFETHYVGLAESS-----             | ERRQVROFIESCMRYNLAIV-----             | -----VLDERTLLECKD                                 |
| Bs-2   | SCWTPAVISCSAYSHDIT-----                 | TAMNNITSHMERHNKAQI-----               | -----VVDERQRFQGITR                                |
| Ng-1   | IGLTCVDYIIOVLDKLSKV-----                | KLPTDLIDFIRKTTSKYGSVKF-----           | -----VLQKNRFVLESPI                                |
| Ng-2   | IGMNTQEIIOVLDKLSKV-----                 | KLSEALINFIRDVTRKYSVKF-----            | -----VLQKNRFVLESPI                                |
| Trva-1 | IGLTGDKIVHVLISLISKT-----                | ALTDTFKEHIIINCCOAVGKLLK-----          | -----VLKEORVYIESIE                                |
| Trva-2 | IGLKAKETIRIRLALISKT-----                | PLTDFEKEHIELCCISVKGKLS-----           | -----VLNWKYVIESIE                                 |
| Gl     | LGWATEIETIRLALISKY-----                 | RRLPPTLSALRILANNOQTISF-----           | -----LYDSNRFILRVBO                                |
| Ehis-1 | GSSTPEAMITTELEKYSKN-----                | YLPDNVKSQIQOAGEKKNFR-----             | -----VLIINGRYLOAES                                |
| Ehis-2 | SGTKPEITTELEKYSKN-----                  | NIPERIEQLEKTKRSRITVT-----             | -----CNYEGRIICG-D                                 |
| Edis-1 | GSSTPEAMITTELEKYSKN-----                | YLPDNVKSQIQOAGEKKNFR-----             | -----VLIINGRYLOAES                                |
| Edis-2 | IGLEATITTELEKYSKN-----                  | NIPERIKTLEKTKRSRITVT-----             | -----CNYEGRIICG-D                                 |
| Dd     | VGLTNDITITVLRGLSKL-----                 | ALPKEVEQFVRQCTOSGKVKL-----            | -----VLQKNRYFVESPI                                |
| Ac**   | VGITLDELINLNDKFSKN-----                 | VLPNELISNITKSAESFGKVKL-----           | -----VLKNGEYFVESPI                                |
| Pf     | IGLSCEDEMLLNLEKFSKN-----                | AIPEDLVVQIQKVASAFGKVKL-----           | -----VLNENKYYIESAE                                |
| Toxg   | VGITLDELINLNDKFSKN-----                 | VLPNELISNITKSAESFGKVKL-----           | -----VLKNGEYFVESPI                                |
| Eimt** | IGLSCEDEMLLNLEKFSKN-----                | AIPEDLVVQIQKVASAFGKVKL-----           | -----VLNENKYYIESAE                                |
| Ta     | VGLSFEELLNLNKFSKN-----                  | ELPKKLESILNTSSAFGKIKI-----            | -----VLRDSRYVIESFE                                |
| Tett-1 | LOYEPKDIILCLEKLSKN-----                 | KIPKFEVERIEMTONYGAARL-----            | -----FLDSSYYLIDIS                                 |
| Tett-2 | LNINAEKTIESLMQYSKN-----                 | VIPKFEIEFIRNKTAKGSAI-----             | -----YMKKNYILKTHO                                 |
| Part-1 | LOYSADDIIRLLDLLSKN-----                 | KVPEQMEQFIRKHTNNIQAAY-----            | -----FLQKSYIIDIGE                                 |
| Part-2 | LGWNEERIKSIVLRLAKNE-----                | RIPKDIIDFIEKNTQYFNRAVF-----           | -----YLEKDSYIIDTEM                                |
| At-1   | VGLTETITISVNLKLSKT-----                 | KLKPEMIEFIHASTANYGKVKL-----           | -----VLKKNRYFIESPF                                |
| At-2   | VGLTETITISVNLKLSKT-----                 | KLKPEIIDFIEHASTANYGKVKL-----          | -----VLKKNRYFIESPF                                |
| Orys-1 | VGLTETITISVMSKLSKT-----                 | KLPREIIDFIEHASTANYGKVKL-----          | -----VLKKNRYFIESPF                                |
| Orys-2 | VGLTETITISVMSKLSKT-----                 | KLPREIIDFIEHASTANYGKVKL-----          | -----VLKKNRYFIESPF                                |

Hs -----PDVIOHLLQDPVIRECLRNRSEGEATELITETFT-----  
Mm -----PDVIOHLLQDPVIRECLRNRSEGEATELITETFT-----  
Drer -----PDVIOHLLQDPVIRECLRNRSEGEATELITETIS-----  
Dm -----PEVLOKLLKDPVIOKCLRSEGEEDF--IQGILD-----  
Ce -----SDVMOKLLKDSVIOKCLRSEGEEDF--IQGILD-----  
Sc -----ADILQMLLNDVIGPLRIDSQVQEPEDVLOQQ-----  
Sp -----ASVLRLLLRDPVIGPLRIDSQVQEPEDVLOQQ-----  
Ca -----ADILQMLLNDVIGPLRIDSQVQEPEDVLOQQ-----  
Nc -----AELLQKLLRDEVIQKWRVQSGDITTSYAPTM-----  
Tb-1 DVKAEEG-----CEEATDELSPLAG-----OVKKEETKEVAEPRRRLSL-----  
Tco-1 SSDAEQE-----ECEGTEALSPCGE---FASPKRFRKRDPGGGGAAPPKHRVLSL-----  
Tv-1 ATLENGG-----TCHSEPAVKKL--KKEDEEFVPEVKVNSLENTEKPRRRLSL-----  
Tc-1 K--KQOK-----QEEDEDGLGPKRAKENGERSVSLVQOEATEETAAPSRFFSL-----  
Lm-1 TILASLNRTSADDAPSPAVTAHVGNDSLETLVKREKVEEEMGDRLSAGGAAASALKTVSSRSAAAPSG---SPTSRLLOLFRPLLPTPA  
Li-1 TILASLNRTGADDVASPAVSAPHVSNDSWKTIVKREKVEEEMGDRLSAGGAAASALKTVSSRSAAAPSG---SPTSRLLOLFRPLLPTPA  
Lb-1 TILASLNRPASDDAASSTLFSPHMRNDTLKTRIKSEKVEEEMGDRLSAGGAAASALKTVSSRSAAAPSG---SPTSRLLOLFRPLLPTPA  
Lmx-1 TILASLNRTSADDAPSPAVTAHVGNDSLETLVKREKVEEEMGDRLSAGGAAASALKTVSSRSAAAPSG---SPTSRLLOLFRPLLPTPA  
Bs-1 TILASLNRTSADDAPSPAVTAHVGNDSLETLVKREKVEEEMGDRLSAGGAAASALKTVSSRSAAAPSG---SPTSRLLOLFRPLLPTPA  
Tb-R -----IVTAKTLLKRDVVRVSLCCQPKETVGE-----  
Tco-2 -----IETANILRDLTIVRSLCAEPPPIVTT-----  
Tv-2\* -----ASTAKALRDVVRVSLCAEPPKASRT-----  
Tc-2\* -----VETRETLRDVVRVSLCAEPPPIVTV-----  
Lm-2\* -----EETRAOMLRDAVIASVATPLRIFYEESS-----  
Li-2\* -----EETRAOMLRDAVIASVATPLRIFYEKSS-----  
Lb-2\* -----EETRAOMLRDAVIASVATPLRIFYETSS-----  
Lmx-2\* -----EETRAOMLRDAVIASVATPLRIFYEESS-----  
Bs-2\* -----G-----RRLEAATLRQRIVSLCAVRDTSVGATAAAT---VRNRQQQT-----  
Ng-1 -----LQIIEKLRNDSVIGKAALIPNPNFEFYLDSS-----  
Ng-2 -----LTIMEKLYEDKIIISAAAVPDPNEFPNVDRS-----  
Trva-1 -----EKLISELIKERFFAEKIVSPPSGVMTHPKYP-----  
Trva-2 -----IRLLELLEIPFFEERHVYPEDEKT-YKHT-----  
Gl TLDLTPDIKDLLED-----ASDNVADTLFEELLRKRNDTAEL-----OKRELKTH-----  
Ehis-1 -----OEOMKVMENEFKQFY-----  
Ehis-2 -----KKIIEEIK-----  
Edis-1 -----OEOMKVMENEFKQFY-----  
Edis-2 -----KKIIEEVK-----  
Dd -----PEVLEFLKDSSTATARIKPTLEESVDDP-----  
Ac\*\* -----PSILNIQOR-VLGQVEMS-----  
Pf -----KSELDYLLNNDTIQARIYSTDNNDKNMISLYNLNRRHRDNNKNDN-----  
Toxg -----KKELDYLLSNPLIRSSAVARRPE---LAQTPQVPA-----  
Eimt\*\* -----  
Ta -----RSELDLLLTNOEIKNSRIHSNIWQKQOLO-----  
Tett-1 -----QVWTSIIERNPHIKDLVSQTFNFDNIINONKELRD-----  
Tett-2 -----EFLEKIRIDEPEY-----KSIIE-----  
Part-1 -----TVLNQIMMNLQDKNSL-----QEVIOEEQIHN-----  
Part-2 -----KLLQELKHKRFQGMH-----NLT-----  
At-1 -----PEVLKRLSDDVINRARFSSEPYYG-----  
At-2 -----PEVLKRLSDDVINRARFTSEPYYG-----  
Orys-1 -----PEVLKTLKDDIICRARISPEDSVG-----  
Orys-2 -----PEVLKTLKDDIICRARISPEDSVG-----

Hs -----SKSAI-----S  
Mm -----SKSAI-----S  
Drer -----SKSAI-----S  
Dm -----GKAIT-----Q  
Ce -----AQEKI-----KFS  
Sc -----LQOT-----  
Sp -----SNEDN-----VED  
Ca -----SEPSN-----IVI  
Nc -----GG-----LVI  
Tb-1 -----SKRISAKSEPLVTRAVVNT-GALQPLPADLEOMLREEENSSRVRIVLQPCLRPVKRRVAV-GGDKOHS-----  
Tco-1 -----CKRSVSSAEFVSRVAVINA-DALRPLPDDIEAMLOEEENSSKVRIVLQPCLOSRKLT---GKRVHNS-----  
Tv-1 -----VRKPPALEPLVARTLVNF-DALLPLPDDLEOMLQDEERSKVRIVLQPRLOGRQCS---SQ-----  
Tc-1 -----VKGVTIQPEPLISHALCFP-DALLPLPDDLEOMLLEENSSRVRIVLQPLRSEFORQO---H-----  
Lm-1 SAAAPTHSPTTRSQLEQGAPIAARPLISLAVVRPADVHRPLPELLOMLKEEENASRVQIVLQPLRFRHOFEASRGASFASITATSRAT  
Li-1 SAAAPIHSPTAGSFLEOCTPIAARPLISLAVVRPADVHRPLPELLOMLKEEENASRVQIVLQPLRFRHOFEASRGASFASITATSRAT  
Lb-1 STAVMLRSPTADSQLEKQAAPSARPLISLAVVRPADVHRPLPELLOMLKEEENASRVQIVLQPLRFRHOFEASRGASFASITATSRAT  
Lmx-1 SAAAPLHSPTTGSQLEQGAPIAARPLISLAVVRPADVHRPLPELLOMLKEEENASRVQIVLQPLRFRHOFEASRGASFASITATSRAT  
Bs-1 SAAAPLHSPTTGSQLEQGAPIAARPLISLAVVRPADVHRPLPELLOMLKEEENASRVQIVLQPLRFRHOFEASRGASFASITATSRAT  
Tb-R -----DA-----  
Tco-2 -----SA-----  
Tv-2\* -----EA-----  
Tc-2 -----VP-----  
Lm-2 -----WEE-SPAP-----  
Li-2 -----WEE-SPAP-----  
Lb-2 -----WAE-NPAP-----  
Lmx-2 -----WDE-NPAP-----  
Bs-2 -----STKTSDKKIEE-GDES-----L-----SHLYITR-----RII-----R  
Ng-1 -----KRFI-----IKS  
Ng-2 -----KRFI-----IRT  
Trva-1 -----KI-----M-I  
Trva-2 -----KF-----L-K  
Gl -----EQGVQS-DQS-----LWYTQSFKIASIPKLRKYFFPL-----  
Ehis-1 -----ECI-----T-  
Ehis-2 -----EFI-----I-  
Edis-1 -----KTGF-----I  
Edis-2 -----NF-----S  
Dd -----LLN-EDOKGKDCYVTYEAPVLDITOLGF-----KIS  
Ac\*\* -----KNNNDNNNIDK-TTSN-----LLKSLSPSPNDGLYVIANAPTLTLDASQLAF-----QVS  
Pf -----AS-GSSS-----  
Toxg -----  
Eimt\*\* -----  
Ta -----N-STSNRNNYVTVISVPT---SDFSE-----VFN  
Tett-1 -----IQK-DLOSFFONIKTENNQOSSKKNQ-RMI  
Tett-2 -----MEONPQOQLLO  
Part-1 -----IQVNPOLKNFEQOIEL  
Part-2 -----SIENYER-----  
At-1 -----GDF-----S  
At-2 -----GDGF-----T  
Orys-1 -----APSF-----T  
Orys-2 -----APSF-----T

Hs KTA-ESSG-----GP-STSRVT-DPO-----GKSDIPMDLDFEYE-----OM-----  
Mm KTAAGSG-----GP-STSOQV-DAQ-----ATSDIPKDLDFEYE-----OM-----  
Dmr KSQODN-G-----GP-SSSOPADGOR-----SGTOVPEDIFSYE-----OM-----  
Dm FTGKLPFGATD-----KPTFPDPAAGAD-----GTTAVPEDITDFEYE-----KI-----  
Ce HGNENEKGV-----KDGAAADGTAAA-----TDGKVPADIDFYG-----KI-----  
Sc -----A-----G-KPAT-----NVMNPDVAVFS-----AVI-----  
Ca KKDI-----TNDSSKE-----TAEKSSSDELFS-----AVV-----  
Ca PGTK-----KNDSTKE-----DPANNGAEDIFA-----SVV-----  
Nc PGTKDAAGVNVQAGLNKSGNKKTAEDG-----AADAATNEADLYA-----AT-----

Tb-1 -----EQ-----OCORAEETKLAYFLTS PDRNHMEHLVSRLODFLVPVLLHGTRRWVVS DVDRGV-----EERS  
Tco-1 -----FN-----OLQRHOYQSDENKLAYFLTS PDRQRMEYLVSHLQEQYLVPI SLHGAI RWIMSDVDRGV-----EERS  
Tv-1 -----AH-----NYQRQNESSEEEALAYFLVSHDRQHMEFLVEHLREYIVPVSLY GALRWVVS DDIRGV-----EERS  
Tc-1 -----HSQGIHHEDEGRLVYFLVS QDRQOMEFLVSRLOEQFLVPVSLHGVMRWVLS DVDRGV-----EERS  
Lm-1 VSKER-NG-----AATGALAERDDOQLFYFVQSRERAHLEHVLPAKREFLEPVVIGCAERWIVSDVDRTP LGNTKGI GD-----AERL  
Li-1 VWKER-NG-----AAAGALADRDDOQLLYFVQSRORAHLEHVLPAKREFLEPVVIGCAERWILSDVDRSPLGNTKGI GD-----AERL  
Lb-1 APKGR-NG-----AATGTPADRDDOQLFYFVQSRORVHLEHVLPAKREFLEPVVIGCAERWILSDVDRSPLMNTSDIKD-----AERL  
Lmx-1 VSKER-NG-----AATGAVADQDDOQLFYFVQSRORAHLEHVLPAKREFLEPVVIGCAERWILSDIDRSPLGDTKGVSD-----AERV  
Bs-1 -----NLFSSGVAFSSGNLAYFLQCSQKPLLEAFANEVKEFLDPYLLGGERAFVISDLVVSD-----APRS

Tb-R -----  
Tco-2 -----  
Tv-2\* -----  
Tc-2 -----  
Lm-2 -----  
Li-2 -----  
Lb-2 -----  
Lmx-2 -----  
Bs-2 APDEEED-----E-----SHEMS

Ng-1 KSN--OVEAFOKTLISTNSNLSNT-----MNEQHVOKEMIG-----AIN-----  
Ng-2 RSKQNELEKFKQALANTS-----T-----VNKGSKIOTEMIR-----AVN-----  
Trva-1 VDEKEAD-----TIISGV-----GQAAHYG-----SVQ-----  
Trva-2 VGKEELE-----TIISGI-----GESSYHG-----NVA-----  
Gl -----E-----ALTSIRKCLKEMRPLS-----GTRSLIT-----IEEYL

Ehis-1 EGSAR-----  
Ehis-2 -----  
Edis-1 EGSAR-----  
Edis-2 -----

Dd INKEVVTGAQISGGLQANQS-----LDPVLKNDALS-----NLL-----  
Ac\*\* TTDE-----  
Pf ESEKQLM-----MEE-----  
Toxg ERDEETD-----PAGLTGAGKSAEP-----G-----DTAPGAVTAVAG-----NLASPGASGD-GDPSETRKRPREEGRETS  
Eimt\*\* -----  
Ta RNHEAPE-----SEE-----  
Tett-1 VEDEQDDG-----IPDKKN-----KLMKNGDSSI-ANY-----  
Tett-2 -----  
Part-1 -----  
Part-2 -----

At-1 VGRT-----SGELEAG-----PG-----ELL-----  
At-2 IGTK-----SGELEAG-----PG-----ELL-----  
Orys-1 ISKT-----AGEMASG-----HE-----DLL-----  
Orys-2 ISKT-----AGEMASG-----HE-----DLL-----

Hs -----DKDEEEE-E-----E-TQTVSFEVKO-----EMIEELO-KRC-IH--LEYPLLAEYD  
Mm -----DKDEEEE-E-----E-TQTVSFEVKO-----EMIEELO-KRC-IC--LEYPLLAEYD  
Dmr -----DKDEEEE-E-----E-TQTVSFEIRO-----EMIEELO-KRC-IO--LEYPLLAEYD  
Dm -----DKEEED-D-----EANKLTVSFEVAO-----EKIEVIO-KRC-IE--LEYPLLAEYD  
Ce -----DGDDEEDAE-----IRNLQQLLTFEIKO-----ETIETVO-KRC-IE--LEYPLLAEYD  
Sc -----DNEREEE-D-----DDIDAVHSFEIAN-----ESVEVVK-KRC-OE--IDYVPLEEYD  
Sp -----GL-----QEE-E-----DDEDAVHLFEIKH-----SSVETIK-KRC-AE--IDYVPLEEYD  
Ca -----GN-----RDD-D-----DDMDTIHSFEIAH-----DSVEIVK-KRC-OD--IDYVPLEEYD  
Nc -----NEEDD-E-----DDKDAVHA FEIPE-----TAVEIVQ-KRC-LD--LGFPILEYD

Tb-1 TAESGRAKTLRRLLEAPSSASGRSVASKSLT--NEGANGDGLGGVGRCTRIVYKSOVMD--GKMRNVRERLY-KE--LGVADLFYD  
Tco-1 TVESGRASVLRWLEFDTPSRLPVFOCHGKEGAGATATPSTGICGGLG-RCRTRIVYKSOVAD--GKMRNVRERLY-KO--LGVADLFYD  
Tv-1 VVEDGRARTLRLEFDTPSGOKSELQ-----ZNSRMA NSTGRKYRTRIVYKSOVMK--GRLNVRERLF-KO--LGVADLFYD  
Tc-1 VVESGRAKTLRRLLEFDTPSVFSASAMD-----DVGCATAAANSTGRKYRTRIVYKSOVMK--GRLNVRERLF-KE--LGVADLFYD  
Lm-1 ARDAGRPVLRRLLYEPPRVGTQYVKA-----AATPSASRELYKQVDRD--GKLEVKECLEF-SK--FDIRADCYD  
Li-1 ARDAGRPVLRRLLYEPPRVGTQYVKA-----AATPSASRELYKQVDRD--GKLEVKECLEF-SK--FDIRADCYD  
Lb-1 TRDAGRPVLRRLLYEPPRVGTQYVKA-----AATPSASRELYKQVDRD--GKLEVKECLEF-SK--FDIRADCYD  
Lmx-1 ARDAGRPVLRRLLYEPPRVGTQYVKA-----AATPSASRELYKQVDRD--GKLEVKECLEF-SK--FDIRADCYD  
Bs-1 -----SGSL--L-----RERRLNGSSGPVTQMVKRIRRA--GCQRQIKEALY-QR--SIRVICTYD

Tb-R -----CPHFLTKSR--AAARVVAER--VL--LGYFLOOQYE  
Tco-2 -----RPYSLRNRR--AVTKVVAER--AA--LGYFLOOQYD  
Tv-2\* -----CSF-LRNR--AAARVVAER--VA--LGFPILOOYD  
Tc-2 -----HSLLVLRNR--AVARRVAER--VL--LGFPILOOYD  
Lm-2 -----YPSFLQSR--AMSKVVAQ--VV--LGLFIOOYD  
Li-2 -----YPSFLQSR--AMSKVVAQ--VV--LGLFIOOYD  
Lb-2 -----YPSFLQSR--AMSKVVAAR--MV--LGFPILOOYD  
Lmx-2 -----YPSFLQSR--VMSKVVAQ--VV--LGLFIOOYD  
Bs-2 --SEAKNAAI--VA-----DKEEHDDDG--ELEEVDLQDH--AASRLVSDVLW-AH--HHLFICQVYH

Ng-1 -----HS-----NYEEYEDDNDLDSEPHETLYSFEISS--KSIESVK-QC-IV--IGHPTLDEYD  
Ng-2 -----OI-----GDDEDDADDDFDS-----  
Trva-1 -----RL-----TEGFD-EIFE--VEKPKIYRFELKP--ETVRDVR-KHA-VD--NNLFLSDEYD  
Trva-2 -----RL-----TEGID-DLLDTPLEKQTIIRFOIKT--ESVREIR-QYA-VD--HNLFLSDEYD  
Gl LLEDEGIDAVR-----NEQVORLQSLMAAEINTEAEMCEL--KIKIEE--FAKAY--  
Ehis-1 -----EVKESDELYRELDLDHVVFTIEVKO--TSVFKIK-KKC-KK--KRVRYVEYH  
Ehis-2 -----INKNELK-----SNLIVFK-KKC-OE--KGLLINEYK  
Edis-1 -----EVKESDELYRELDLDHVVFTIEVKO--TSVFKIK-KKC-KK--KRVRYVEYH  
Edis-2 -----INKNELK-----SNLIEFK-KKC-OE--KGLLINEYK  
Dd -----EEEEEDTVN--NSDQHFHFVFEIDP--QVBEVK-KRC-IO--LDYVPLEYD  
Ac\*\* -----ETGQVIVVALPISVTOEVAEIK-KLL-LA--HNFHFLIEFD  
Pf -----KKHANLNANENSTNSAEVYSFVNC--DKIEEVK-OEA-LO--TMRPFLMEYD  
Toxg GAEEARGKAQVPL-ASPHASASP--TGEDGDSAKRKTMSAPTRQVFSQVSS--DRVEEVK-RVS-VE--SMHRPFLMEYD  
Eimt\*\* -----

Ta -----TTTAKFAGRSKTTTTRQVFSFEVQO--EKIEDLK-REA-LO--TMRPFLVMEYD  
Tett-1 --D-----DEDEEDSD-----DGDDDFVNFIMNKTKRSEFKRIQI-I--GDHFEVT-KAV-IN--CSVFLIOEYD  
Tett-2 -----E-----ESRVNFKFYRIEQ-K--HNLFOIT-EKI-IK--EGISLINEYH  
Part-1 --K-----EADIEQMA-----KEIDTFKDWLAQRIQTIEKFRIT-V--GDYFDVA-QAL-IR--SNVFLIOEYD  
Part-2 -----QD-----SLINDN--KTFVKEKIK--NEHFSVM-RELVED--SNVFKQEFD  
At-1 -----NEAEFAA--AEEKETHSFEIDP--AQVENVK-QRC-LFNALNPFMLEYD  
At-2 -----NEAEFAA--AEEKETHSFEIDP--ALVENVK-QRC-LFNALNPFMLEYD  
Orys-1 -----DGMELAA--TEDKETHSFEIDP--SQVENVK-QRC-LFNALNPFMLEYD  
Orys-2 -----DGMELAA--TEDKETHSFEIDP--SQVENVK-QRC-LFNALNPFMLEYD

WM I  
\*\*\*\*

Hs FRNDS-----VNPDIINI-DLKPTAVLRPYQEKSLRKMFGNG-----RARSGVIVLPCGAGKTLVG  
Mm FRNDT-----LNPDINI-DLKPTAVLRPYQEKSLRKMFGNG-----RARSGVIVLPCGAGKTLVG  
Drer FRNDT-----VNPDIINI-DLKPTAVLRPYQEKSLRKMFGNG-----RARSGVIVLPCGAGKTLVG  
Dm FRNDT-----MNPDIINI-DLKPAAVLRPYQEKSLRKMFGNG-----RARSGVIVLPCGAGKTLVG  
Ce FRNDT-----LNPNLGI-DLKPTAVLRPYQEKSLRKMFGNS-----RARSGVIVLPCGAGKTLVG  
Sc FRNDH-----LNPDLDI-DLKPTQIRPYQEKSLRKMFGNG-----RARSGVIVLPCGAGKTLVG  
Sp FRNDN-----LNPDLDI-DLKPTQIRPYQEKSLRKMFGNG-----RARSGVIVLPCGAGKTLVG  
Ca FRHDA-----RNPDLEI-DLKPTQIRPYQEKSLRKMFGNG-----RARSGVIVLPCGAGKTLVG  
Nc FRNDS-----NNADLEI-DLRPTQIRPYQEKSLRKMFGNG-----RAKSGVIVLPCGAGKTLVG  
Tb-1 YVQDH-----SLHVCLELSENVLRPYQVASLERFRSGN-----KAHOGVIVLPCGAGKTLTG  
Tco-1 YLQDQ-----SLHVCLELSENVLRPYQVASLERFRSGN-----KAHOGVIVLPCGAGKTLTG  
Tv-1 YNEDC-----TLHVCDELGAGHARLRPYQVASLERFRSGN-----KAHOGVIVLPCGAGKTLTG  
Tc-1 YVQDG-----TLDVDRDLALAEHVLRPYQVASLERFRSGN-----KAHOGVIVLPCGAGKTLTG  
Lm-1 YMQDH-----TLYVPNLSLASHVLRPYQVASLERFRSGN-----KAHOGVIVLPCGAGKTLTG  
Li-1 YMQDR-----TLHVPNLNLASHVLRPYQVASLERFRSGN-----KAHOGVIVLPCGAGKTLTG  
Lb-1 YVQDR-----TLYVPNLTLARHVLRPYQVASLERFRSGN-----KAHOGVIVLPCGAGKTLTG  
Lmx-1 YMQDR-----TLHVPNLHLASHVLRPYQVASLERFRSGN-----KAHOGVIVLPCGAGKTLTG  
Bs-1 YMRDL-----QPTVANFSLRLGVRLRPYQASLERFRSGN-----KAHOGVIVLPCGAGKTLTG  
Tb-R YEK-----DTSIRNVNI-ALKSQTRRPRPYQIAAVDAASD-----AERSGIVLPCGAGKTLVG  
Tco-2 YER-----DTRTRVNI-ALKSQTRRPRPYQIDAVDAATAD-----SERSGIVLPCGAGKTLVG  
Tv-2\* YER-----DMSIRVNI-ALKSQTRRPRPYQIDAVDAAVSD-----SERSGIVLPCGAGKTLVG  
Tc-2\* YER-----DSGVRNIN-MLKQTKRPRPYQIDAVDAATE-----SERSGIVLPCGAGKTLVG  
Lm-2\* FEN-----DTSVYTAHI-SLRQTKRPRPYQIDAVDAIHD-----TLNSGILLPCGAGKTLTG  
Li-2\* FEN-----DTSVYTAHI-SLRQTKRPRPYQIDAVDAIHD-----TLNSGILLPCGAGKTLTG  
Lb-2\* FEN-----DTSVYTAHI-SLRQTKRPRPYQIDAVDAIHD-----TLNSGILLPCGAGKTLTG  
Lmx-2 FEN-----DTSVYTAHI-SLRQTKRPRPYQIDAVDAIHD-----TLNSGILLPCGAGKTLTG  
Bs-2 FASADDSVVHDDKGGADHVLNSAASRDHAANDVSRISNL-VLRPQCRPRPYQIAAVEAALAH-----GTAVRSGVILLPCGAGKTLVG  
Ng-1 FRNDK-----RNSSLVI-DLKPTTIRSYQEKSLNKMFSNG-----RARSGVIVLPCGAGKTLVG  
Ng-2 -----  
Trva-1 FMNDK-----SLKNLNI-RLRTEINIRPYQEKALSKMFSNG-----RAKSGVIVLPCGAGKTLVG  
Trva-2 FMNDK-----TIDNLDI-QLKNTTRIRPYQEKALTKMFSNG-----RSISGIVLPCGAGKTLVG  
Gl QVKAPQINA-QLKPTTDLRDYQDHASKKVI SEVQLDTSQIVKRCNSGLVVLPCGAGKSLG  
Ehis-1 FLRDK-----QKE-LPT-QLR-KDCLRPHQERALQOIFDNE-----MARSQIVLPCGAGKTLTA  
Ehis-2 I-----GKKTIP-ALKDDTVLRKYQISGIVSFRK-----FAQSGIILPCGAGKTLMT  
Ehis-1 FLRDK-----QKE-LPT-QLR-KDCLRPHQERALQOIFDNE-----MARSQIVLPCGAGKTLTA  
Ehis-2 I-----GKGRINI-SLKDDTVLRKYQIKGINSVFKK-----FAQSGIILPCGAGKTLMS  
Dd FRNDT-----VNPDLNI-DLKPTMIRPYQEKSLRKMFGNG-----RARSQIVLPCGAGKLSG  
Ac\*\* FLTNRWSEK-----ACANLAT-NLKEGTGVRPYQKRAAFSLFWDN-----KAHSIILVPCGAGKTLVG  
Pf FRRDK-----KNPNLIC-SLKSHVIRPYQEKALRKMFSNG-----RSRSQIVLPCGAGKTLTG  
Toxg FRRDK-----TNKNLSLLKSSTKIRYQERALRKMFSNG-----RARSQIVLPCGAGKTLTG  
Eimt\*\* MFSNG-----RARSQIVLPCGAGKTLTG  
Ta FRKDN-----NSPFLNC-CIRSNIKIRYQERALRMRFSNG-----RARSQIVLPCGAGKTLTG  
Tett-1 FENK-----SEKOLE-ELKPKIKVRYQERALKNIFIQ-----KARSGLIILPCGAGKTLVG  
Tett-2 DDKESQNDLSSN-----VQIPYKLDI-ELRQITOPRIYQKALKNIFVCE-----KPRSATIVLPCGAGKTLTG  
Part-1 FTKE-----K-OKLDI-NLKPSTKPRLYQRAAKTVIMGD-----YAKSGLIVLPCGAGKTLVG  
Part-2 YLKDLENTKQ-D-----I-OKKLOF-RMKAIVLYSHONRALKIFOND-----KAHSGVILPCGAGKTLTG  
At-1 FRNDN-----VNPDLDM-ELKPHAQPRPYQEKSLRKMFGNG-----RARSQIVLPCGAGKSLVG  
At-2 FRNDN-----VNPDLDM-ELKPHAQPRPYQEKSLRKMFGNG-----RARSQIVLPCGAGKSLVG  
Orys-1 FRNDT-----VNPDLDM-ELKPHAQPRPYQEKSLRKMFGNG-----RARSQIVLPCGAGKSLVG  
Orys-2 FRNDT-----VNPDLDM-ELKPHAQPRPYQEKSLRKMFGNG-----RARSQIVLPCGAGKSLVG

WM IA  
\*\*\*\*

Hs VTAACVTRKRCVLVGNLSAVSVQWKAQFKMWSTIDD-----SQICRFSTDAKDK-PIG--  
Mm VTAACVTRKRCVLVGNLSAVSVQWKAQFKMWSTIDD-----SQICRFSTDAKDK-PIG--  
Drer VTAACVTRKRCVLVGNLSAVSVQWKAQFKMWSTIDD-----SQICRFSTDAKDK-PIG--  
Dm VTAACVTRKRALVLCNSGVSVEQWKAQFKMWSTADD-----SMICRFSTSEAKDK-PMG--  
Ce VTAAVTTVNRKRCVLVANSVSVQWRAQFKLWSTIQD-----KQLVRFTRKADP-APSGA  
Sc ITAACTIKKSVIVLCTSSVSVQWROQFLQWCTLOP-----ENCAVFTSDNKEM-FOT--  
Sp ITAACTIKKSVIVLCTSSVSVQWROQFLQWCTLOP-----DHAIVFTADHKER-FHS--  
Ca ITAACTIKKSVIVLCTSSVSVQWROQFLQWCTLOP-----ENCAVFTSENKEM-FAS--  
Nc ITAACTIKKGVIVLCTSSVSVQWROQFLQWCTLOP-----DDIAVFTAESKKN-FSG--  
Tb-1 IGAATVKKRTIVMCINVMVSVLQWREFLRWNTLSE-----DQVTVCSIDKQKQ--  
Tco-1 IGAATVKKRTIVMCINVMVSVLQWREFLRWNTLSE-----EQTVCISDQKQK--  
Tv-1 IGAATVKKRTIVMCINVMVSVLQWREFLRWNTLSE-----DQVTVCSIDKQKQ--  
Tc-1 IGAATVKKRTIVMCINVMVSVLQWREFLRWNTLSE-----DQVTVCSIDKQKQ--  
Lm-1 IGAATVKTITIVMCINVMVSVLQWREFLRWNTLSE-----DEVTVCIAKVKQR--  
Li-1 IGAATVKTITIVMCINVMVSVLQWREFLRWNTLSE-----DEVTVCIAKVKQR--  
Lb-1 IGAATVKTITIVMCINVMVSVLQWREFLRWNTLSE-----DEVTVCIAKVKQR--  
Lmx-1 IGAATVKTITIVMCINVMVSVLQWREFLRWNTLSE-----DEVTVCIAKVKQR--  
Bs-1 IGAATVKTITIVMCINVMVSVLQWREFLRWNTLSE-----DQVTVCVRGMKQR--  
Tb-R IMLLCKVKKPT ILLCAGSVSVQWKNLLEFSLCAPANNEEGDPSNS-----T-----TGEKVRTAAVCAARTSCITGKOKIE-I-----  
Tco-2 VMLLCKVKKPT ILLCAGSVSVQWKNLLEFSLCAPANNEEGDPSNS-----A-----TSKRARPPAVCAARTSCITGKOKIE-I-----  
Tv-2\* IMLLCKVKKPT ILLCAGSVSVQWKNLLEFSLCAPANNEEGDPSNS-----GT-----ASGRORTRIEGVAARTSCITGKOKIE-I-----  
Tc-2 IMLLCKVKKPT ILLCAGSVSVQWKNLLEFSLCAPANNEEGDPSNS-----A-----AAEKHRSRLECAARTSCITGKOKIE-I-----  
Lm-2 IMLMCKVKKPT VVLCAGSVSVQWKNLLEFSLCAPANNEEGDPSNS-----A-----GGRPHQIKNCAARTSCITGKOKIE-I-----  
Li-2 IMLMCKVKKPT VVLCAGSVSVQWKNLLEFSLCAPANNEEGDPSNS-----A-----GGRPHQIKNCAARTSCITGKOKIE-I-----  
Lb-2 IMLMCKVKKPT VVLCAGSVSVQWKNLLEFSLCAPANNEEGDPSNS-----A-----GGRPHQIKNCAARTSCITGKOKIE-I-----  
Lmx-2 IMLMCKVKKPT VVLCAGSVSVQWKNLLEFSLCAPANNEEGDPSNS-----A-----GGRPHQIKNCAARTSCITGKOKIE-I-----  
Bs-2 VLLAAVKKRTIIVCAGSISVQWKNLLEFSLCAPANNEEGDPSNS-----A-----GGRPHQIKNCAARTSCITGKOKIE-I-----  
Ng-1 VTAASTIKKHTIVLVCINVMVSVLQWREFLRWNTLSE-----DSILVHTSOKKAT-LPK--  
Ng-2 -----SAVETFYLFENINTECELEWKNQFKLWSTIDE-----NRVVVFTSOKKAT-LPK--  
Trva-1 ITAVATINKPAPVVCNSVEPVKQWANOFLWNTVPG-----GVVVVLTSENKQA-LP--  
Trva-2 IAAALATINKPTIVLCNNRLTVKQWYNOLIQATMDM-----KXIFLSDTEKQA-LP--  
Gl VACACRLGKSCIVVTVNGNLSKQWNSOFLQFVFS-----DRVYVTSANKQKQ-LP--  
Ehis-1 IACSKLKRSTIVLTHHTQSVQWKEFLKWSITPL-----DAIKLVSSSKKEQ-LGD--  
Ehis-2 IGICTQEQPTIILCTTTTISIEQWKEFLKWSITPL-----NKIKFSSIIKEE--  
Ehis-1 IACSKLKRSTIVLTHHTQSVQWKEFLKWSITPL-----DAIKLVSSSKKEQ-LGD--  
Ehis-2 IGICTQEQPTIILCTTTTISIEQWKEFLKWSITPL-----NKIKFSSIIKEE--  
Dd IAACTVKSILVLCISAVSVQWKEFLKWSITPL-----RQISKFTSDNKKEK-ISN--  
Ac\*\* IYVSSIIKKCIVLFCSTMMAVNQWKEFLKWSITPL-----RQISKFTSDTRKGEWD--  
Pf IAACTVKSILVLCISAVSVQWKEFLKWSITPL-----RHRILVTSYKLD-LWP--  
Toxg IAACTVKSILVLCISAVSVQWKEFLKWSITPL-----RHRILVTSYKLD-LWP--  
Eimt\*\* IYVSSIIKKCIVLFCSTMMAVNQWKEFLKWSITPL-----RQISKFTSDTRKGEWD--  
Ta IYVSSIIKKCIVLFCSTMMAVNQWKEFLKWSITPL-----RHRILVTSYKLD-LWP--  
Tett-1 IYVSSIIKKCIVLFCSTMMAVNQWKEFLKWSITPL-----RHRILVTSYKLD-LWP--  
Tett-2 IYVSSIIKKCIVLFCSTMMAVNQWKEFLKWSITPL-----RHRILVTSYKLD-LWP--  
Part-1 IYVSSIIKKCIVLFCSTMMAVNQWKEFLKWSITPL-----RHRILVTSYKLD-LWP--  
Part-2 IYVSSIIKKCIVLFCSTMMAVNQWKEFLKWSITPL-----RHRILVTSYKLD-LWP--  
At-1 VSAARIKKSCILCLATNAVSDQWAFQKLSITKD-----DQICRFSTDSKER-FRG--  
At-2 VSAARIKKSCILCLATNAVSDQWAFQKLSITKD-----DQICRFSTDSKER-FRG--  
Orys-1 VSAARIKKSCILCLATNAVSDQWAFQKLSITKD-----EHSIRFTSDNKKEK-FRG--  
Orys-2 VSAARIKKSCILCLATNAVSDQWAFQKLSITKD-----EHSIRFTSDNKKEK-FRG--







|        | WM V<br>*****                                              | WM VI<br>*****                    |
|--------|------------------------------------------------------------|-----------------------------------|
| Hs     | TSIDLPEANVLI                                               | IOISSHGGSSRROEAQLGRILIRAKKGMV     |
| Mm     | TSIDLPEANVLI                                               | IOISSHGGSSRROEAQLGRILIRAKKGMV     |
| Drer   | TSIDLPEANVLI                                               | IOISSHGGSSRROEAQLGRILIRAKKGMV     |
| Dm     | TSIDLPEANVLI                                               | IOISSHGGSSRROEAQLGRILIRAKKGMV     |
| Sc     | TSIDLPEANVLI                                               | IOISSHGGSSRROEAQLGRILIRAKKGMV     |
| Sp     | TSIDLPEANVLI                                               | IOISSHGGSSRROEAQLGRILIRAKKGMV     |
| Ca     | TSIDLPEANVLI                                               | IOISSHGGSSRROEAQLGRILIRAKKGMV     |
| Nc     | TSIDLPEANVLI                                               | IOISSHGGSSRROEAQLGRILIRAKKGMV     |
| Tb-1   | VADLLEPCASVVI                                              | IOISGLGASRROEAQLGRILIRPKPAS       |
| Tco-1  | VADLLEPCASVVI                                              | IOISGLGASRROEAQLGRILIRPKPPS       |
| Tv-1   | VADLLEPCASVVI                                              | IOISGLGASRROEAQLGRILIRPKPPS       |
| Tc-1   | VADLLEPCASVVI                                              | IOVSLGASRROEAQLGRILIRPKPPS        |
| Lm-1   | VADLLEPCASVVI                                              | IOVSLGASRROEAQLGRILIRPKPPS        |
| Li-1   | VADLLEPCASVVI                                              | IOVSLGASRROEAQLGRILIRPKPPS        |
| Lb-1   | VADLLEPCASVVI                                              | IOVSLGASRROEAQLGRILIRPKPPS        |
| Lmx-1  | VADLLEPCASVVI                                              | IOVSLGASRROEAQLGRILIRPKPLS        |
| Bs-1   | IADLLEPCASVVI                                              | IQLSGLGASRROEAQLGRILIRPKPAS       |
| Tb-R   | VSVLLEPCANVVI                                              | VOVSHHGSSRROEAQLGRILIRPKKAS       |
| Tco-2  | VSVLLEPCANVVI                                              | IOVSHHGSSRROEAQLGRILIRPKKAG       |
| Tv-2*  | VSVLLEPCANVVI                                              | IOVSHHGSSRROEAQLGRILIRPKKAG       |
| Tc-2*  | VSVLLEPCANVVI                                              | IOVSHHGSSRROEAQLGRILIRPKKAS       |
| Lm-2   | VSVLLEPCANVVI                                              | IOVSHHGSSRROEAQLGRILIRPKKAS       |
| Li-2   | VSVLLEPCANVVI                                              | IOVSHHGSSRROEAQLGRILIRPKKAS       |
| Lb-2   | VSVLLEPCANVVI                                              | IOVSHHGSSRROEAQLGRILIRPKKAS       |
| Lmx-2  | VSVLLEPCANVVI                                              | IOVSHHGSSRROEAQLGRILIRPKKAS       |
| Bs-2   | VSVLLEPCANVVI                                              | IOVSHHGSSRROEAQLGRILIRPKQND       |
| Ng-1   | TAIDLPEATVI                                                | IOISSHFGSSRROEAQLGRILIRPKNGT      |
| Ng-2   | TAIDLPEATVI                                                | IOISSHFGSSRROEAQLGRILIRPKGGG      |
| Trva-1 | KAILDLPANVLI                                               | IQLCSHFARMQESQLGRVLRPKPGR         |
| Trva-2 | KAILDLPASVVI                                               | VOVCSNYGARMQESQLGRVLRPKSGN        |
| Gl     | TSLDLPEANVLI                                               | IELDWOERSRROEAQLGRILIRPKSGD       |
| Ehis-1 | VGLDLPEASVA                                                | IQLSSSSGSSRROEAQLGRILIRAKDGT      |
| Ehis-2 | TSLDLPEASVI                                                | IOISTNNGSRKQOLQLGRILIRAKDGT       |
| Edis-1 | VGLDLPEASVA                                                | IQLSSSSGSSRROEAQLGRILIRAKDGT      |
| Edis-2 | TSLDLPEASVI                                                | IOISTNNGSRKQOLQLGRILIRAKDGT       |
| Dd     | TSIDLPEATVI                                                | IOVSSHYSRROEAQLGRILIRPKPKS        |
| Ac**   | HSIDLPEANVVI                                               | IOVGVVDSRROEAQLGRILIRPKPGA        |
| Pf     | NAIDLPIANVVI                                               | IOISFNFASSRROEAQLGRILIRPKKANEKKN  |
| Toxg   | NAIDLPIANVVI                                               | IOISFNFASSRROEAQLGRILIRAKPOAGE    |
| Eimt** | GQQQQQQHSSSSSTSTSTAAAAAPARVAAPARAVALLEGVAAGLAPKNEQEHHHQQQQ | QQQQQQOQVROEAQLGRILIRAKPRGAE      |
| Ta     | NALDIPCANVVI                                               | IOISFNFASSRROEAQLGRILIRPKSKTDEH   |
| Tett-1 | TAIDLPEANVVI                                               | IOIGMHFKSSRROEAQLGRILIRAKIMRAKENY |
| Tett-2 | TALDLPANVVI                                                | IOIGFQFGSSRROEAQLGRILIRAKIMRKEGO  |
| Part-1 | TGIDIPASVVI                                                | IEIGYLGSSRROEAQLGRILIRAKVMPKQNT   |
| Part-2 | OGLDLPANVVI                                                | IOISFNFKSVROEAQLGRILIRAKKLEDRMA   |
| At-1   | NSIDLPEANVVI                                               | IOISSHAGSSRROEAQLGRILIRAKKLEDRMA  |
| At-2   | NSIDLPEANVVI                                               | IOISSHAGSSRROEAQLGRILIRAKKLEDRMA  |
| Orys-1 | NSIDLPEANVVI                                               | IOISSHAGSSRROEAQLGRILIRAKKLEDRMA  |
| Orys-2 | NSIDLPEANVVI                                               | IOISSHAGSSRROEAQLGRILIRAKKLEDRMA  |

XPB signature  
\*\*\*\*\*

|        |                                      |                      |    |       |                |
|--------|--------------------------------------|----------------------|----|-------|----------------|
| Hs     | AAEYNAFFYSILVSDTQEMANSTKQRFLVD       | OGYSFKVITKLAGMEE     | E  | D     | LA             |
| Mm     | AAEYNAFFYSILVSDTQEMANSTKQRFLVD       | OGYSFKVITKLAGMEE     | E  | E     | LA             |
| Drer   | AAEYNAFFYSILVSDTQEMANSTKQRFLVD       | OGYSFKVITKLAGMEE     | E  | D     | LM             |
| Dm     | AAEYNAFFYSILVSDTQEMANSTKQRFLVN       | OGYSFKVITKLAGMDDT    | S  | D     | LM             |
| Ce     | TDQFNMAFFYSILVSDTQEMANSTKQRFLVN      | OGYAYKVVNNLPGMEL     | E  | D     | LK             |
| Sc     | DEGFMAFFYSILVSDTQEMANSTKQAFLLVD      | OGYAFKVI THLHGMENT   | P  | N     | LA             |
| Sp     | DEGFMAFFYSILVSDTQEMANSSKQAFLLVD      | OGYAFKVI THLKGMENT   | P  | N     | LA             |
| Ca     | DEGFMAFFYSILVSDTQEMANSTKQAFLLVD      | OGYAFKVI THLGMEL     | P  | D     | LA             |
| Nc     | DVGFNMAFFYSILVSDTQEMANSSKQAFLLVD     | OGYAFKVI THLANIENT   | P  | D     | LA             |
| Tb-1   | LDNVCSEYILVSDTQEMANISQSYERQSWLRD     | OGFSYRVLQSDMVLQHFLL  |    |       | RTGGKLCVGPFR   |
| Tco-1  | LDNVCSEYILVSDTQEMANISQSYERQSWLRD     | OGFSYRVLQSDTVLQHFLL  |    |       | KTGGKLCVGPFR   |
| Tv-1   | LDSSCSEYILVSDTQEMANISQSYERQSWLRD     | OGFSYRVLQSDTVFCHLL   |    |       | RTGGKLCVGPFR   |
| Tc-1   | LDNTCAEYILVSDTQEMANISQSYERQSWLRD     | OGFAIRILHCDRVLSEFA   |    |       | RVGGPCCVGPFR   |
| Lm-1   | LDNTCAEYILVSDTQEMANISQSYERQSWLRD     | OGFAIRILHCDRVLSEFA   |    |       | RVGGPCCVGPFR   |
| Li-1   | LDNTCAEYILVSDTQEMANISQSYERQSWLRD     | OGFAIRILHCDRVLSEFA   |    |       | RVGGPCCVGPFR   |
| Lb-1   | LDNTCAEYILVSDTQEMANISQSYERQSWLRD     | OGFAIRILHCDRVLSEFA   |    |       | RVGGPCCVGPFR   |
| Lmx-1  | LDNTCAEYILVSDTQEMANISQSYERQSWLRD     | OGFAIRILHCDRVLSEFA   |    |       | RVGGPCCVGPFR   |
| Bs-1   | VDSTTAFFYSILVSDTQEMANISQSYERQSWLRD   | OGFAIRILHCDRVLSEFA   |    |       | RVGGPCCVGPFR   |
| Tb-R   | NGKPTDAFFYSILVSDTQEMANISQSYERQSWLRD  | OGFCVSVTEFNDGAPAEAA  |    |       |                |
| Tco-2  | NGKAVDAFFYSILVSDTQEMANISQSYERQSWLRD  | OGFCRVMEFYDDVAOTA    |    |       |                |
| Tv-2*  | NGKAVDAFFYSILVSDTQEMANISQSYERQSWLRD  | OGFCRVMEFYDDVAOTA    |    |       |                |
| Tc-2*  | NGKMPDAFFYSILVSDTQEMANISQSYERQSWLRD  | OGFCRIIEFQDDELSNDE   |    |       |                |
| Li-2   | NGRTVDAFFYSILVSDTQEMANISQSYERQSWLRD  | OGFCRIMEYSPFTSSVDT   |    |       |                |
| Lb-2   | NGRTVDAFFYSILVSDTQEMANISQSYERQSWLRD  | OGFCRVMEYSPFTSSVDT   |    |       |                |
| Lmx-2  | NGRAVDAFFYSILVSDTQEMANISQSYERQSWLRD  | OGFCRVMEYSPFTSSVDT   |    |       |                |
| Bs-2   | SAGPVDAAFFYSILVSDTQEMANISQSYERQSWLRD | OGFCRVMEYSPFTSSVDT   |    |       | NTTGGGGAVVVVAA |
| Ng-1   | NKOAYFFYSILVSDTQEMANISQSYERQSWLRD    | OGYSFVRLADIQKYSSNRVE | T  |       | KF             |
| Ng-2   | LKNQOAYFFYSILVSDTQEMANISQSYERQSWLRD  | OGYSFVRLADIQKYSSNRVE | I  |       | KH             |
| Trva-1 | TDEYNAFFYSILVSDTQEMANISQSYERQSWLRD   | OGYSFVRLADIQKYSSNRVE | P  |       | LS             |
| Trva-2 | REEFNAAFFYSILVSDTQEMANISQSYERQSWLRD  | OGYSFVRLADIQKYSSNRVE | SA |       | LS             |
| Gl     | NSAYFFYSILVSDTQEMANISQSYERQSWLRD     | OGYSFVRLADIQKYSSNRVE | PE |       | LI             |
| Ehis-1 | NSAYFFYSILVSDTQEMANISQSYERQSWLRD     | OGYSFVRLADIQKYSSNRVE |    | FNDCE | FTRFD          |
| Ehis-2 | RIGYFFYSILVSDTQEMANISQSYERQSWLRD     | OGYSFVRLADIQKYSSNRVE |    |       | ED             |
| Edis-1 | NSAYFFYSILVSDTQEMANISQSYERQSWLRD     | OGYSFVRLADIQKYSSNRVE |    |       | ED             |
| Edis-2 | GIVYFFYSILVSDTQEMANISQSYERQSWLRD     | OGYSFVRLADIQKYSSNRVE |    |       | ED             |
| Dd     | DGLNAAFFYSILVSDTQEMANISQSYERQSWLRD   | OGYSFVRLADIQKYSSNRVE | V  |       | LK             |
| Ac**   | DVSNAAFFYSILVSDTQEMANISQSYERQSWLRD   | OGYSFVRLADIQKYSSNRVE |    |       | EE             |
| Pf     | INDPAAFFYSILVSDTQEMANISQSYERQSWLRD   | OGYSFVRLADIQKYSSNRVE | I  |       | LV             |
| Toxg   | GENFNAAFFYSILVSDTQEMANISQSYERQSWLRD  | OGYSFVRLADIQKYSSNRVE | K  |       | LI             |
| Eimt** | DGGFNAAFFYSILVSDTQEMANISQSYERQSWLRD  | OGYSFVRLADIQKYSSNRVE | O  |       | LV             |
| Ta     | GFNAAFFYSILVSDTQEMANISQSYERQSWLRD    | OGYSFVRLADIQKYSSNRVE | S  |       | LV             |
| Tett-1 | DGOYNAFFYSILVSDTQEMANISQSYERQSWLRD   | OGYSFVRLADIQKYSSNRVE |    |       | FK             |
| Tett-2 | KGEYNAFFYSILVSDTQEMANISQSYERQSWLRD   | OGYSFVRLADIQKYSSNRVE |    |       | FK             |
| Part-1 | NHEIOAFFYSILVSDTQEMANISQSYERQSWLRD   | OGYSFVRLADIQKYSSNRVE |    |       | YK             |
| Part-2 | IGEVCEFFYSILVSDTQEMANISQSYERQSWLRD   | OGYSFVRLADIQKYSSNRVE |    |       | LO             |
| At-1   | GGKEEYNAFFYSILVSDTQEMANISQSYERQSWLRD | OGYSFVRLADIQKYSSNRVE | K  |       | LS             |
| At-2   | GGKEEYNAFFYSILVSDTQEMANISQSYERQSWLRD | OGYSFVRLADIQKYSSNRVE | S  |       | LS             |
| Orys-1 | GGKEEYNAFFYSILVSDTQEMANISQSYERQSWLRD | OGYSFVRLADIQKYSSNRVE | P  |       | LK             |
| Orys-2 | GGKEEYNAFFYSILVSDTQEMANISQSYERQSWLRD | OGYSFVRLADIQKYSSNRVE | P  |       | LK             |

Hs FSTK-----EFQOOL---LOKV-LAATDLDA-----EEEV-----A--G-EF--GSR-----  
Mm FSTK-----EFQOOL---LOKV-LAATDLDA-----EEEV-----A--G-EF--GSR-----  
Drer FSTF-----DECOOL---LOKV-LASDLDL-----EEEV-----M--G-EV--GK-----  
Dm YGTO-----EFQOOL---LOLV-LASDLDL-----EDEK-----P--G-EP--GY-----  
Ce FSOLOL---ESOLOL---LOQV-LATSADADA-----EEEDV-----K--E-EL--AD-----  
Sc YASP-----REERLE---LOEV-LLKNEEAA-----GIEVG-----DDADN-SV--GRGNG--  
Sp YASP-----AERLEL---LOEV-LLQNEEAA-----DLDDG-----EDT--SF--GSR-----  
Ca YSSA-----REERLE---LOQV-LLKNEEAA-----GLEIG-----DDADT-NF--ISKEKR--  
Nc FATA-----QERREL---LQRT-LVDNEKGA-----EDDVE-----T--DD-LF--GKVGRG--  
Tb-1 WWYE-----CAGPSCD-----SAVAAKGTWIP-----FSQEAALRM--QSRFV--AGVRCGLD  
Tco-1 WWYE-----CTASSSP-----LSVAAKGSYWT-----FSRMSARL--QSRFV--AGVCSCEL  
Tv-1 WWYE-----SDRAADS-----AISWKGSIWLP-----FSPEARCI--QRRFI--DGSASCEL  
Tc-1 WWYE-----TLERKLP-----SAVAAKGSIWLP-----FSQEAALRM--HRFFV--NGREVCCL  
Lm-1 WWYQ-----THNTASATPSET-AAAVDVGVVHYDGFYWP-----FSADAAALI--EAAFO--HGRATCIV  
Li-1 WWYQ-----THNTASATPSET-AAVADAGVVHYDGLYWP-----FSVDAALI--EAAFO--HGRVCTIL  
Lb-1 WWYQ-----THLTVSAAASSEM-EVGAGVGVAAHHDGLYWAR-----FSAEASALV--EAAFO--HGRATCTL  
Lmx-1 WWYQ-----MHNTASATPSET-AAVADVGVVHYDGLYWP-----FSADAAALI--EAAFO--HGRATCTL  
Bs-1 WYWL-----SDELESPEFVNAT-H---SSDAENGRIGRWK-----FSRAHSVAI--DEAFQ--RGQLSLPL  
Tb-R -----VEG-VDDTAPG-DVVS-IRQAKIRGTFKK-OELKCS-----VA-----SP-TAOGS  
Tco-2 -----PEVAEEPVMG-DVVS-IRQERLRGDFSK-ORLKCS-----SP-----SS-AIRGN  
Tv-2\* -----TDDVAVAEEAG-DVVS-IRKOEKIRLSALRE-KKLOCE-----SI-----T--VPOGS  
Tc-2\* -----ALGGVKQOVKKHRICG-DVVS-IRKOEKIRLSALRE-KKLOCE-----CSG-----RD-ADAGD  
Lm-2\* -----ALGGVKQOVKKHRICG-DVVS-IRKOEKIRLSALRE-KKLOCE-----RSC-----RG-ADAGD  
Li-2\* -----SLGRMKOLAKKERVCG-DVVS-IRKOEKIRLSALRE-KKLOCE-----RSC-----HG-AGADG  
Lb-2\* -----ALGGVKQOVKKHRICG-DVVS-IRKOEKIRLSALRE-KKLOCE-----RSC-----CG-ADAGD  
Lmx-2\* -----ALGGVKQOVKKHRICG-DVVS-IRKOEKIRLSALRE-KKLOCE-----RSC-----CG-ADAGD  
Bs-2 YGEA-----SE-KNV---KRETNGGHESSPHNRTG-DAAVTKRETLMNDVNH-ERRLVGASETTRIAHANHSTFGGG-GGAPHTSI  
Ng-1 MKTK-----EDELFE---LKLK-KNAKDVNG---KLEDI-----PNDDF-QS-----  
Ng-2 MNTK-----KEELDM---LAIV-KKAEDARG---QEEKI-----NVDDDE-VE-----  
Trva-1 LDTQ-----EKREDW---LRQM-MDTPDLSL---LDADA-----TVPDE-DRS---FD-----VPOGGQR  
Trva-2 SD-E---KSEEEW---LRKM-LKVEKIQS---EETEA-----ESYSS-D-E---YE-----ESQ-SDYIDTIKSA  
Gl TWKKVRIFYDDVROAAIEQKLS  
Ehis-1 PAKE-----GKDINY---VTEM-LKKKDEK---VKEVV-----KTKK-KT  
Ehis-2 ---T-----NQNLN---IKYI-LNESDKRYFNKSKKES-----IID--F-----  
Ehis-1 PAKE-----GKDINY---VTEM-LKKKDEK---VKEIV-----KTKK-KTFLN  
Ehis-2 ---I-----NQNLN---IKYI-LNESDKRYFNKSKKEI---NIN--D---F-----  
Dd YSSK-----ODQLDL---LAQV-LGEGDSG---KNEIL-----EE--DF---DDITRG-----IVNKRITGGREARE  
Ac\*\* FTRD-----SKQDNL---LAAI-ROEMEKNEPEGRSEYSEL---DDKPT-KRETKKKGTTRORLNK---IVNKRITGGREARE  
Pf YKKN-----KIQENL---LKCI-LASTDDGN---MDEDD-----DLFED---OSFKDNTKVNKTN-SNIL-----L  
Toxg YGDP-----QRQAI---LTDI-LASDDDNK---TLDDD-----EDDPS-RQVLSAVAGDRGRFFRVN-SNLGDDGWWGSEECQL  
Eimt\*\* YGDR-----DRQAL---LRDI-LLSDDLK---SLDED-----EDEGA-YLPQOQEQO  
Ta YSKP-----SIQOEL---LODI-ITSAEDVD---DEEE-----VNPT-----DLFTPTNE---SS-LQVS-----  
Tett-1 WMSQ-----LDSDY---LYTL-LMNSEONQONGK---MSS-----EESSSGDSSGSDSESEEG  
Tett-2 YDPP-----ILDOKI---IR---ASDEIKDKVKDAWFLI---ODQPKKV-DEQDD  
Part-1 YIKQ-----MNMEDL---LEQI-MLSSNDLTKVI---DQI-----EEEVQ---VVTNTFSQOEGG  
Part-2 LDKI-----VDEM---ORQVL-----ETCTQ---KGDDDREEDG  
At-1 YHSQ-----EQQLSL---LGKV-MNAGDDL---GLEOL-----EE--DT---DGMA  
At-2 YHSQ-----EQQLSL---LGKV-LNAGDDMV---GLEOL-----EE--DT---DGKA  
Orys-1 YYTL-----NDQLEL---LAQL-LSARDDMI---GIEHL-----EE--DS---DGKA  
Orys-2 YYTL-----NDQLEL---LAQS-LSARDDMI---GIEHL-----EE--DS---DGKA

Hs -----SOA-SRRFGTM-SSMSGAD-DTVMEYHSSRSKA--P-----  
Mm -----GOA-SRRCGTM-SSLGAD-DTVMEYHSSRSKA--S-----  
Drer -----QF-SRRAGTM-SSMSGAD-DALYMEYQMPRGSKASV-----  
Dm -----SGSGGA-VRRVGGGL-SSMSGGD-DAIYEHK---N-----  
Ce -----GTIRI-SRREATM-ASMSGGO-GAQYHSK---AKA-----  
Sc -----HKRFKSKA-VRGEGSL-SGLAGGE-DMAYMEYSTNKNKELKE-----  
Sp -----LSRAPAKA-KRSSGSL-STLAGAD-NMAYVEYKNSANKQLKK-----  
Ca -----MRLEQERNGGGA-TYSSGSL-AGLAGGE-DMAYIEYGKNKKNELRE-----  
Nc -----RG-GAKGRAAAV-RRMAGTL-GELSGGO-DMAYIEQNKAAKGLKK-----  
Tb-1 TATVLR---DTPRPPE---LKN---MGVEEKV---TVCFSDSCAPETFGTVOLV---EG-----  
Tco-1 TSSVLG---DTPRPEG---LRD---SGVEERW---TVRFSDSNAPETFGTVQVS---EG-----  
Tv-1 DGSVLV---GTPRPEG---LGG---SLEDSEW---TVRFSDSNAPETFGTVQFV---KE-----  
Tc-1 DSTVLN---DTPRTAE---LAV---SGLGEKW---IVRFSDSNAPETFGTVOMA---ED-----  
Lm-1 RGSSELG---RGTFRPSSSEELGRYPLLSSES---KVTFSVDAPOTFGTVLIG---EG-----  
Li-1 RGSSELG---RGTFRPSSSEELGRYPLLSSES---KVTFSVDAPOTFGTVLIG---EG-----  
Lb-1 RGSSELG---RGTFRPSSSEELGRYPLLSSES---KVTFSVDAPOTFGTVLIG---EG-----  
Lmx-1 RGSSELG---RGTFRPSSSEELGRYPLLSSES---KVTFSVDAPOTFGTVLIG---EG-----  
Bs-1 RVSHAL---PSSQRGSAALTLR---PGQLTL---RVTFSADAPITFGTVQCF---VAEG-----  
Tb-R -----VNPRSL-DYQEKL---CRVVASW---BMDYON---ATSOQNEPGVANDTATG---LID-----  
Tco-2 -----INVRSA-QYCLDL---ARVVSNW---BMDYHN---AVSTQKSGSKSEGLQRG---DLK-----  
Tv-2\* -----VDARKI-EXOLDL---SRVVSNW---LEYHS---QGLKQASSGHGDFPPDD---DANVSE-  
Tc-2 -----CRAESL-SYOLKL---SKVVSWS---BIEFQO---ECRKRRTAVRDADDNA---ANETDS-  
Lm-2 -----CRTESL-SYOLEL---SKVVSWS---BIEFQO---ECRKRRTAVRDADDNA---ANETDS-  
Li-2 -----RRTESL-SYOLGL---SKVVSWS---BIEFQO---ECRKRRTAVRDADDNA---T---DD-  
Lb-2 -----CRTESL-SYOLEL---SKVVSWS---BIEFQO---ECRKRRTAVRDADDNA---ADETGS-  
Lmx-2 -----VDVGRR-KWCLRL---ASMVGRW---LQYLQ---ATSRGAVSAKTNARRTNQKGNRRNNQDEGNESESSVSSSSGSDADNG  
Ng-1 -----GS-HSGDTSI-ALLSGCANEVYHTFEASNSKK---K-----  
Ng-2 -----KS-----SSSL-ASI-SGGNEIYHSYEASTTTSRRRGK---AT-----  
Trva-1 -----NOFKAIVK-----  
Trva-2 -----PHFSLN-----  
Gl -----  
Ehis-1 -----  
Ehis-2 -----  
Ehis-1 -----  
Ehis-2 -----  
Dd -----AKKSKSSAPTVS-RTTGGST-RALSGGN-DMNYMEYQAPAIYK-----  
Ac\*\* -----  
Pf -----NKKEDSLKKI-DNTTGGGL-LKLSSNM-DVTFADKKKIP-----T-----  
Toxg ESFGESLRGFGDAPHV-QELOGGL-GRLAGDG-GAAIGARPGGRGGGRSRS---GG-----  
Eimt\*\* -----QQQQQQQHEQQFNV-RVVOGGL-AGTSGKP-STHSFASP-----  
Ta -----I-SQKKIQL-ASLSGSL-KNQLQYKHLPLPS-EKPAK-----KS-----  
Tett-1 -----HFNITTKA-ANPLQNL-ALYKETQ-----LNKY-----  
Tett-2 -----  
Part-1 -----  
Part-2 -----Y-----  
At-1 -----LQKA-RRSMGSM-SVMSGSK-GMVMEYNSGRHKSQOQFK-----KP-----  
At-2 -----LK-T-RRSMGSM-SAMGAN-CRVMEYNSGRQKSGNQS-----KP-----  
Orys-1 -----LMKA-RRSAGSM-SAFSGSG-GMVMEYNSGKKGKAGA-SK-----KP-----  
Orys-2 -----LMKA-RRSAGSM-SAFSGSG-GMVMEYNSGKKGKAGA-SK-----KP-----

```

Hs --SKHVHPLFKRFRK
Mm --SKHVHPLFKRFRK
Drer --GKNIHPLFKRFRK
Dm --IGSVHPLFKRFRG
Ce --IAERHPLFKRFRQ
Sc ----HHPLIRKMYKLNKK
Sp --DSKEHHALFKHLYTKRR
Ca ----SHHPLIQKMYKQKAKK
Nc --KGAAGA--EQSAFFKKLQREKERSRAL-----ARQG
Tb-1 ---NP---LLVRRV-----CC-----GPLAVEHDCDLHGG-----EECLOYAVQOMKVMVAKNSKNRIPLTT
Tco-1 ---DP---LAVRRV-----CC-----GSLLLNHNCLSEE-----EGCLLDLVERMRSVAEKVSKH
Tv-1 ---KP---LFVRRV-----CC-----GPIGTDHNCLK-----EECLOHALQHAQSVATKRSTR
Tc-1 ---NP---TLVRRV-----CY-----GPLDAHDCDLKGE-----EECIQYILGOMRYRIKRRSNPR
Lm-1 ---APSSPLRERV-----RR-----GCLDRSHRCIPATA--DQESRCISFARNTVLRARDTRGSDAVTEVE
Li-1 ---APSSPLRERV-----RR-----GCLDRSHRCIPATA--DQESHCSFVFNNTVLRARDTRGSDAVTEAE
Lb-1 ---APSSPLRERV-----RR-----GCLDRSHQCISAAA--DHESRCISFARGAVLHGRNTRDSDSVIVAE
Lmx-1 ---APSSPLRERV-----RR-----GCLDRSHRCIPATA--DQESRCIRFARNTVLCVRDTRGSGAVTETE
Bs-1 ---GSQQLVGERRI-----AKHLWNEPLGDTEEDHCCTD-----HDECLMWLLQRVGDAKQLHKRGRQD
Tb-R -----KMKRAREDETAED IKREWNNSGAQTTPQRG-----DFCRILPQOR-----LVGANDDVVYHES-
Tco-2 -----KEVKAGVSDSPEAIKREWAPRAAAQNQGA-----ALYRTSLQD-----LVGVSDDFIYHEL-
Tv-2* -----GRDVM EIVPDSDLAAIKREWAGGTRMDQFQF-----GHSC TSLQG-----LVSVDENEFVYHEL
Lm-2 -----ADDVVEVRPRTTYAAIKSEWRSGADSA-----RVTALEFD-----LVGVDDGFEVYHEL
Li-2 -----ADDVVEARPRTTYAAIKSEWRSGADSA-----RVTALEFD-----LVGVDDGFEVYHEL
Lb-2 -----ADGVTEARSMRTYATIKNEWRVSGDHET-----RATALEHN-----LVGVDDGFEVYHEL
Lmx-2 -----ADDVVEARPRTTYAAIKSEWRSGADSAN-----RVTALEFD-----LVGVDDGFEVYHEL
Bs-2 SDVEIVEPAISKGNKAQQSTNHRSLIDIKKRYGVTAGVPARGMTVVTTTTLQQQQDASMLLAR-----FTTSADGIYVYHEL
Ng-1 KVAKTVHPLFKKRN
Ng-2 KVPSTVHPLFKTRTQHKD
Trva-1
Trva-2
Gl
Ehis-1
Ehis-2
Edis-1
Edis-2
Dd -SIPTQHALFKQRAKNKQ
Ac**
Pf KKFADKHILFRKFLSONK
Toxg ADATSMHPLFRGLHGKK
Eimt**
Ta KSSSEQHPYFKKLYSTK
Tett-1
Tett-2
Part-1
Part-2
At-1 KDPTKRHNLFKKRYV
At-2 KDPTKRHNIFKKRYV
Orys-1 KDPSKRHYLFKKRYQ
Orys-2 KDPSKRHYLFKKRYQ

```

**Fig. S1.** Multiple sequence alignment of XPB amino acid sequences

The encoded protein sequences of specified *XPB* genes were aligned using the Clustal Omega server of the European Bioinformatics Institute (<http://www.ebi.ac.uk/Tools/services/web/toolform.ebi?tool=clustalo>) at default parameters (Sievers *et al.*, 2011).

The XPB domain, Walker motifs (WM I, WM Ia, WM II-VI), RED residue loop, thumb-like domain (Thm) and XPB signature motif were highlighted in the members of the Opisthokonta supergroup, comprising the eukaryotic model organisms for TFIID research (top nine sequences). If a position within the Opisthokonta was more than 50% identical or similar, the residue was highlighted in black or gray, respectively, and the highlighting was then applied to the kinetoplastid sequences (blue lettering) to demonstrate the conservation of these domains in the latter.

To detect putative DNA repair-specific sequence conservation in kinetoplastid XPB-R sequences, positions of XPB-R-specific identity (one mismatch allowed) that was not present in any of the kinetoplastid XPB sequences was highlighted in purple. If this position was also conserved in the Opisthokonta model organisms (more than 50% similarity) the identities were highlighted in red.

If a species contained two *XPB* sequences, the one with greater similarity to *T. brucei* XPB received the name affix 1 and the other sequence the affix 2.

Kinetoplastid accession numbers were derived from [www.GeneDB.org](http://www.GeneDB.org). Ac, *Acanthamoeba castellanii* (XP\_004356478); At-1/At-2, *Arabidopsis thaliana* (Q38861 / NP\_568591); Bs-1/Bs-2 *Bodo saltans* (BS16690.1:pep / BS91250.1:pep); Ca, *Candida albicans* (EEQ43396); Ce, *Caenorhabditis elegans* (NP\_499487); Dd, *Dictyostelium discoideum* (XP\_647819); Dm, *Drosophila melanogaster* (NP\_001137931); Drer, *Danio rerio* (Q7ZV1); Edis-1/Edis-2, *Entamoeba dispar* (EDI\_083940 / EDI\_292260); Ehis-1/Ehis-2, *Entamoeba histolytica* (XP\_649651 / XP\_654948); Eimt, *Eimeria tenella* (ETH\_00032995); Gl, *Giardia lamblia* (GL50803\_16512); Hs, *Homo sapiens* (accession number P19447); Lb-1/Lb-2, *Leishmania braziliensis* (LbrM.29.0600 / LbrM.32.4160); Li-1/Li-2, *Leishmania infantum* (LinJ.29.0610 / LinJ.32.4070); Lm-1/Lm-2, *Leishmania major* (LmjF29.0590 / LmjF32.3920); Lmx-1/Lmx-2, *Leishmania mexicana* (LmxM.08\_29.0590 / LmxM.31.3920); Mm, *Mus musculus* (NP\_598419); Nc, *Neurospora crassa* (XP\_957329); Ng-1/Ng-2, *Naegleria gruberi* (XP\_002674455 / XP\_002683056); Orys-1/Orys-2, *Oryza sativa* (EEE55219 / EEC71313.1); Part-1/Part-2, *Paramecium tetraurelia* (XP\_001448651 / XP\_001425941); Pf, *Plasmodium falciparum* (PF10\_0369); Sc, *Saccharomyces cerevisiae* (CAY80363); Sp, *Schizosaccharomyces pombe* (NP\_593474); Ta, *Theileria annulata* (XP\_952567.1); Tb-1/Tb-R, *Trypanosoma brucei* XPB/XPB-R (Tb927.3.5100 / Tb927.11.16270); Tc-1/Tc-2, *Trypanosoma cruzi* (TcCLB.510149.50 / TcCLB.511527.20); Tco-1/Tco-2, *Trypanosoma congolense* (TclL3000\_3\_3090 / TclL3000.11.16180); Tett-1/Tett-2, *Tetrahymena thermophila* (XP\_001032673 / XP\_001470758); Toxg, *Toxoplasma gondii* (XP\_002365647); Trva-1/Trva-2, *Trichomonas vaginalis* (XP\_001582312 / XP\_001326086); Tv-1/Tv-2, *Trypanosoma vivax* (TvY486\_0304470 / TvY486\_1117180).

\* The *T. vivax* XPB-2 gene appears to be a partial gene, missing sequence for ~220 C-terminal amino acids

\*\* The single *E. tenella* and *A. castellanii* XPB genes miss a large portion of the XPB N-terminus including the XPB domain, suggesting that the reading frames of these genes are incomplete.

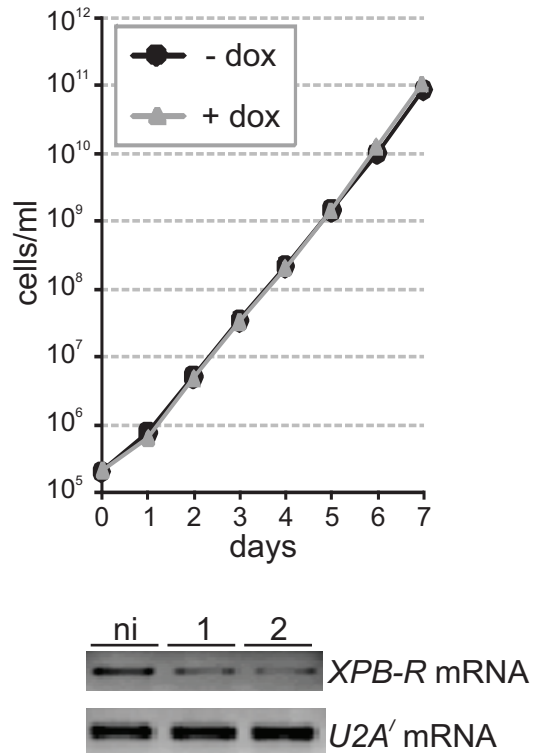

**Fig. S2.** *XPB-R* is not essential for trypanosome proliferation in culture.

Growth curve of a representative bloodstream form cell line in which doxycycline-induced *XPB-R* dsRNA synthesis led to RNAi-mediated *XPB-R* silencing. The lower panel shows a semi-quantitative PCR analysis of total RNA that was reverse transcribed with oligo-dT and prepared from non-induced cells (ni) and cells that were induced with doxycycline for one or two days. The spliceosomal *U2A'* coding sequence was amplified as a control.

**A**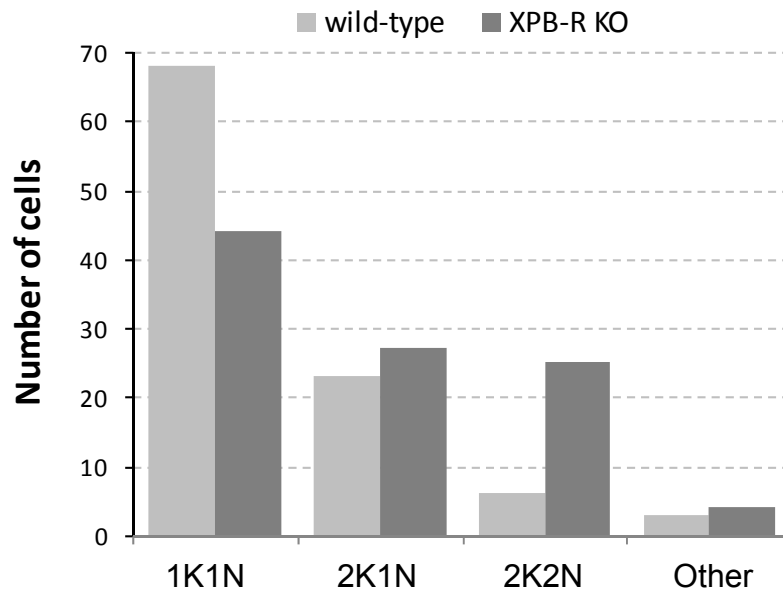**B**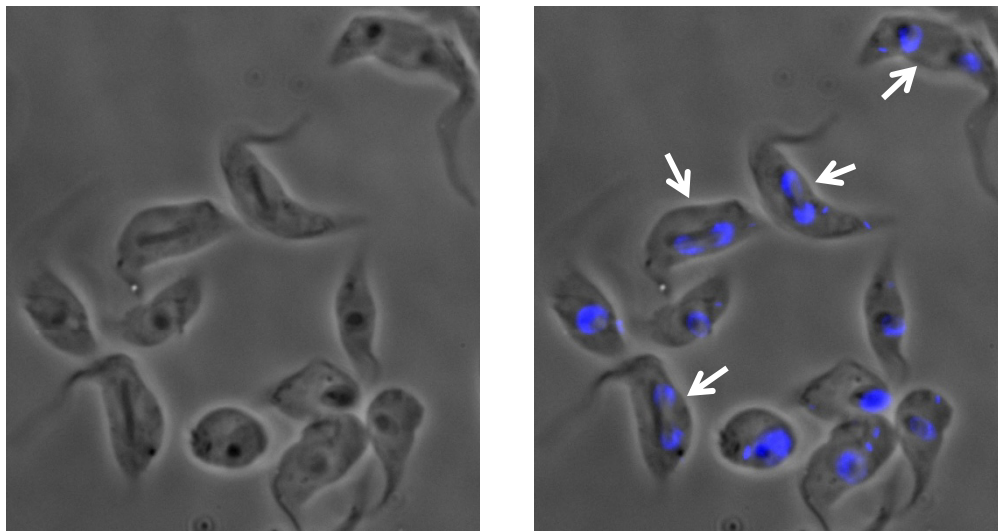

**Fig. S3.** *XPB-R* knockout appears to affect completion of mitosis

A. Diagram showing the number of wild-type procyclic (n=100) and *XPB-R* knockout cells (*XPB-R* KO; n= 100) that are in the 1K1N (1 kinetoplast and 1 nucleus), 2K1N, and 2K2N stages of the cell cycle. "Other" combines aberrant cells that have no nuclei (zoids) or more than two nuclei.

B. Image of *XPB-R* KO cells stained with DAPI showing an accumulation of 2K2N cells (white arrows).

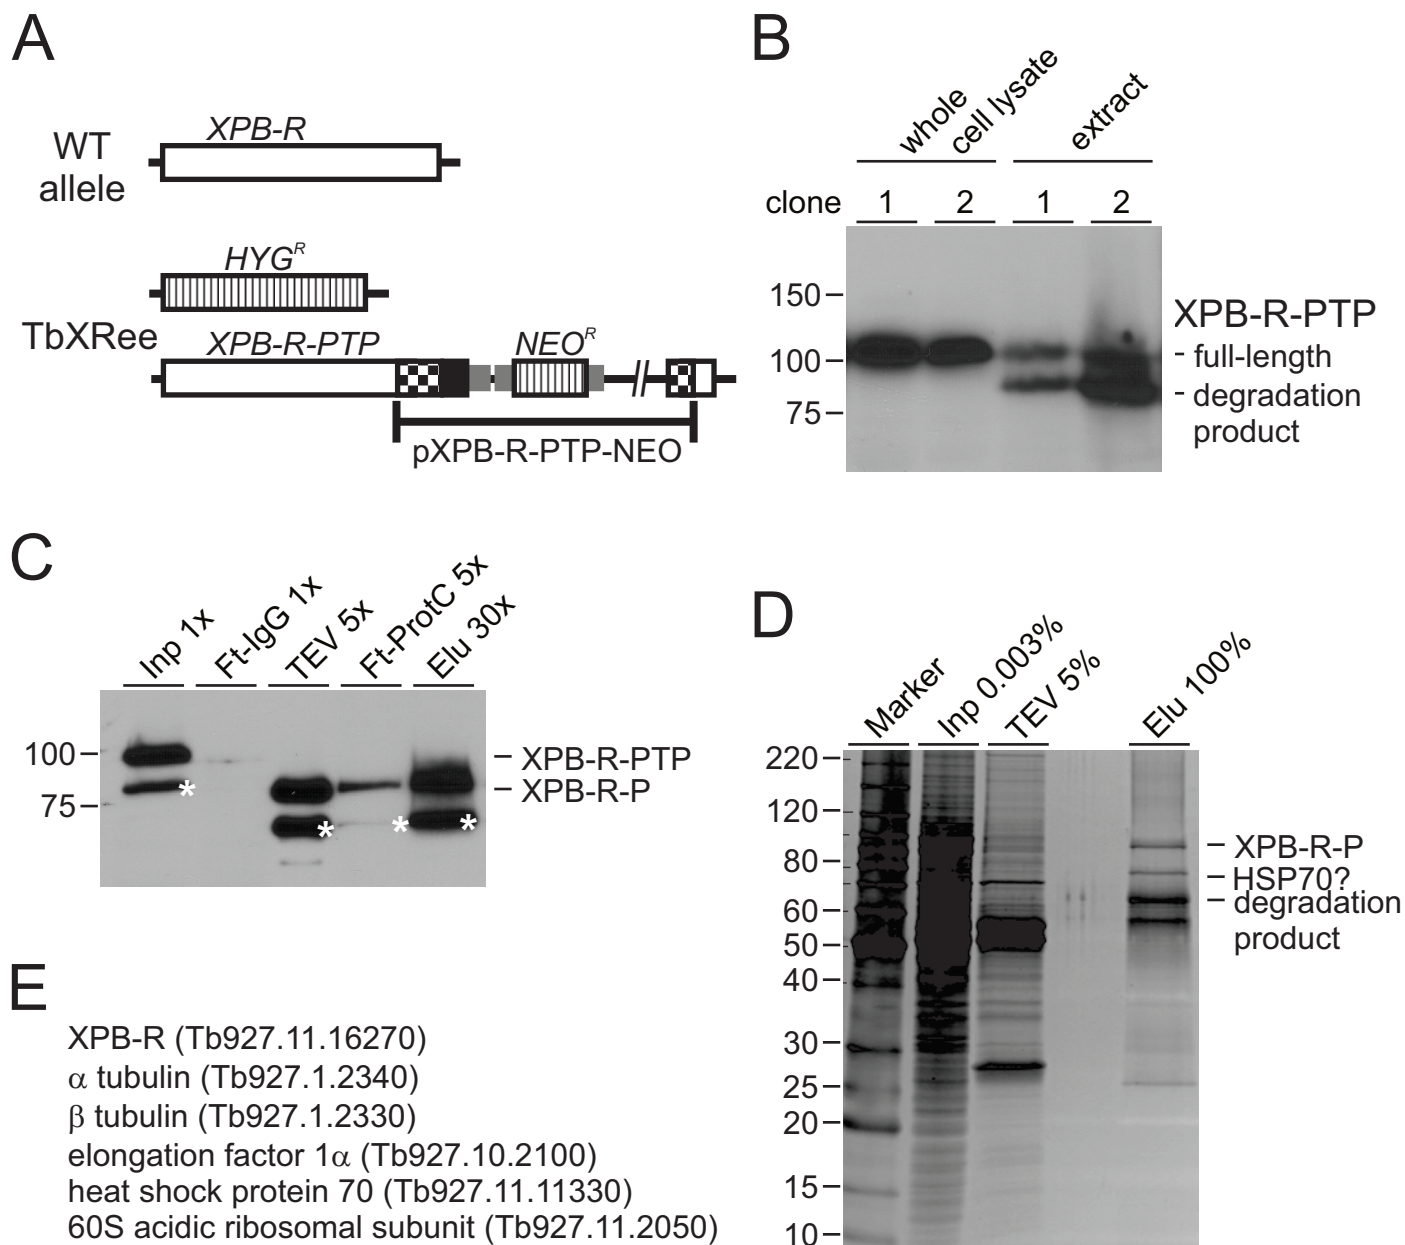

**Fig. S4.** PTP tagging and tandem affinity purification (TAP) of XPB-R

A. Schematic depiction (not to scale) of a *XPB-R* wild-type (WT) allele and of the *XPB-R* locus of procyclic TbXRee cells that exclusively express XPB-R-PTP and no wild-type, untagged XPB-R. XPB-R, HYG<sup>R</sup>/NEO<sup>R</sup> coding regions and PTP tag are indicated by open, striped and black boxes, respectively. Gene flanks for RNA processing signals are drawn as smaller gray boxes.

B. Whole cell lysates and crude, cell-free extracts of two TbXRee cell lines were analyzed by immunoblotting with the monoclonal anti-Protein C epitope antibody HPC4 that recognizes the PTP tag.

*XPB-R-PTP is N-terminally degraded upon extract preparation.*

C. Immunoblot monitoring of XPB-R-PTP tandem affinity purification. Aliquots of crude extract (Inp), the flowthrough of the IgG affinity chromatography (Ft-IgG), the TEV protease elution (TEV), the flowthrough of the anti-ProtC affinity chromatography (Ft-ProtC), and the final eluate (Elu) were probed with the HPC4 antibody. The x-values indicate relative amounts analyzed. Note that during the TEV protease digest ~19 kDa of protein is removed from XPB-R-PTP resulting in XPB-R-P. Asterisks indicate the XPB-R degradation product.

D. Aliquots of input material (Inp), the TEV protease eluate (TEV) and the final eluate (Elu) were separated on a 10-20% SDS-polyacrylamide gradient gel and stained with sypro ruby. Percentages indicate relative amounts analyzed. Band assignments on the right are guided by apparent protein size.

E. List of proteins that were unambiguously identified by liquid chromatography/tandem mass spectrometry in the final TAP eluate.

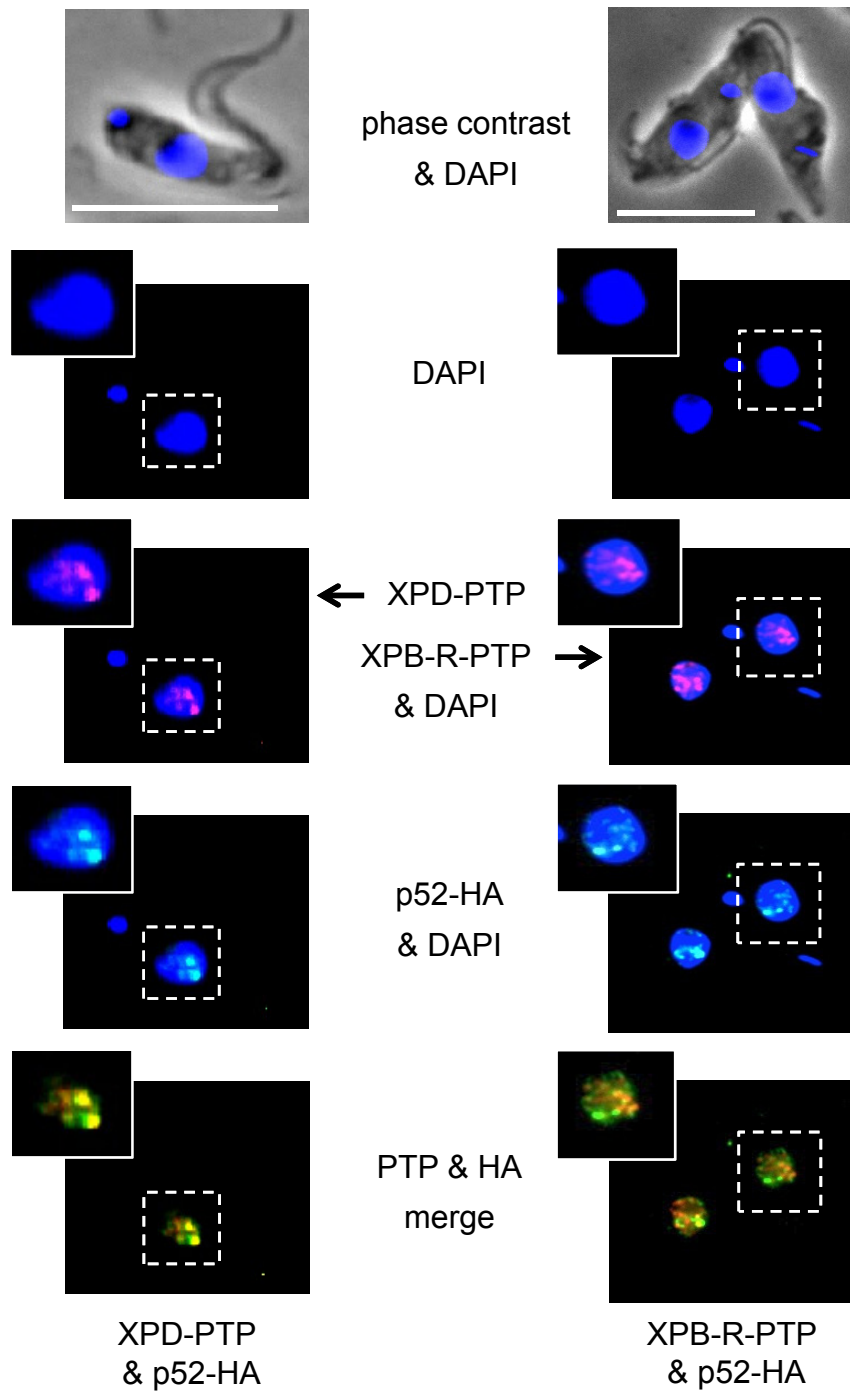

**Fig. S5.** XPB-R-PTP co-localizes with p52-HA outside putative *SLRNA* expression foci in the nucleus p52-HA (green) was co-localized with XPD-PTP (red; left panels) or with XPB-R-PTP (red, right panels). White bars represent 10  $\mu$ m.

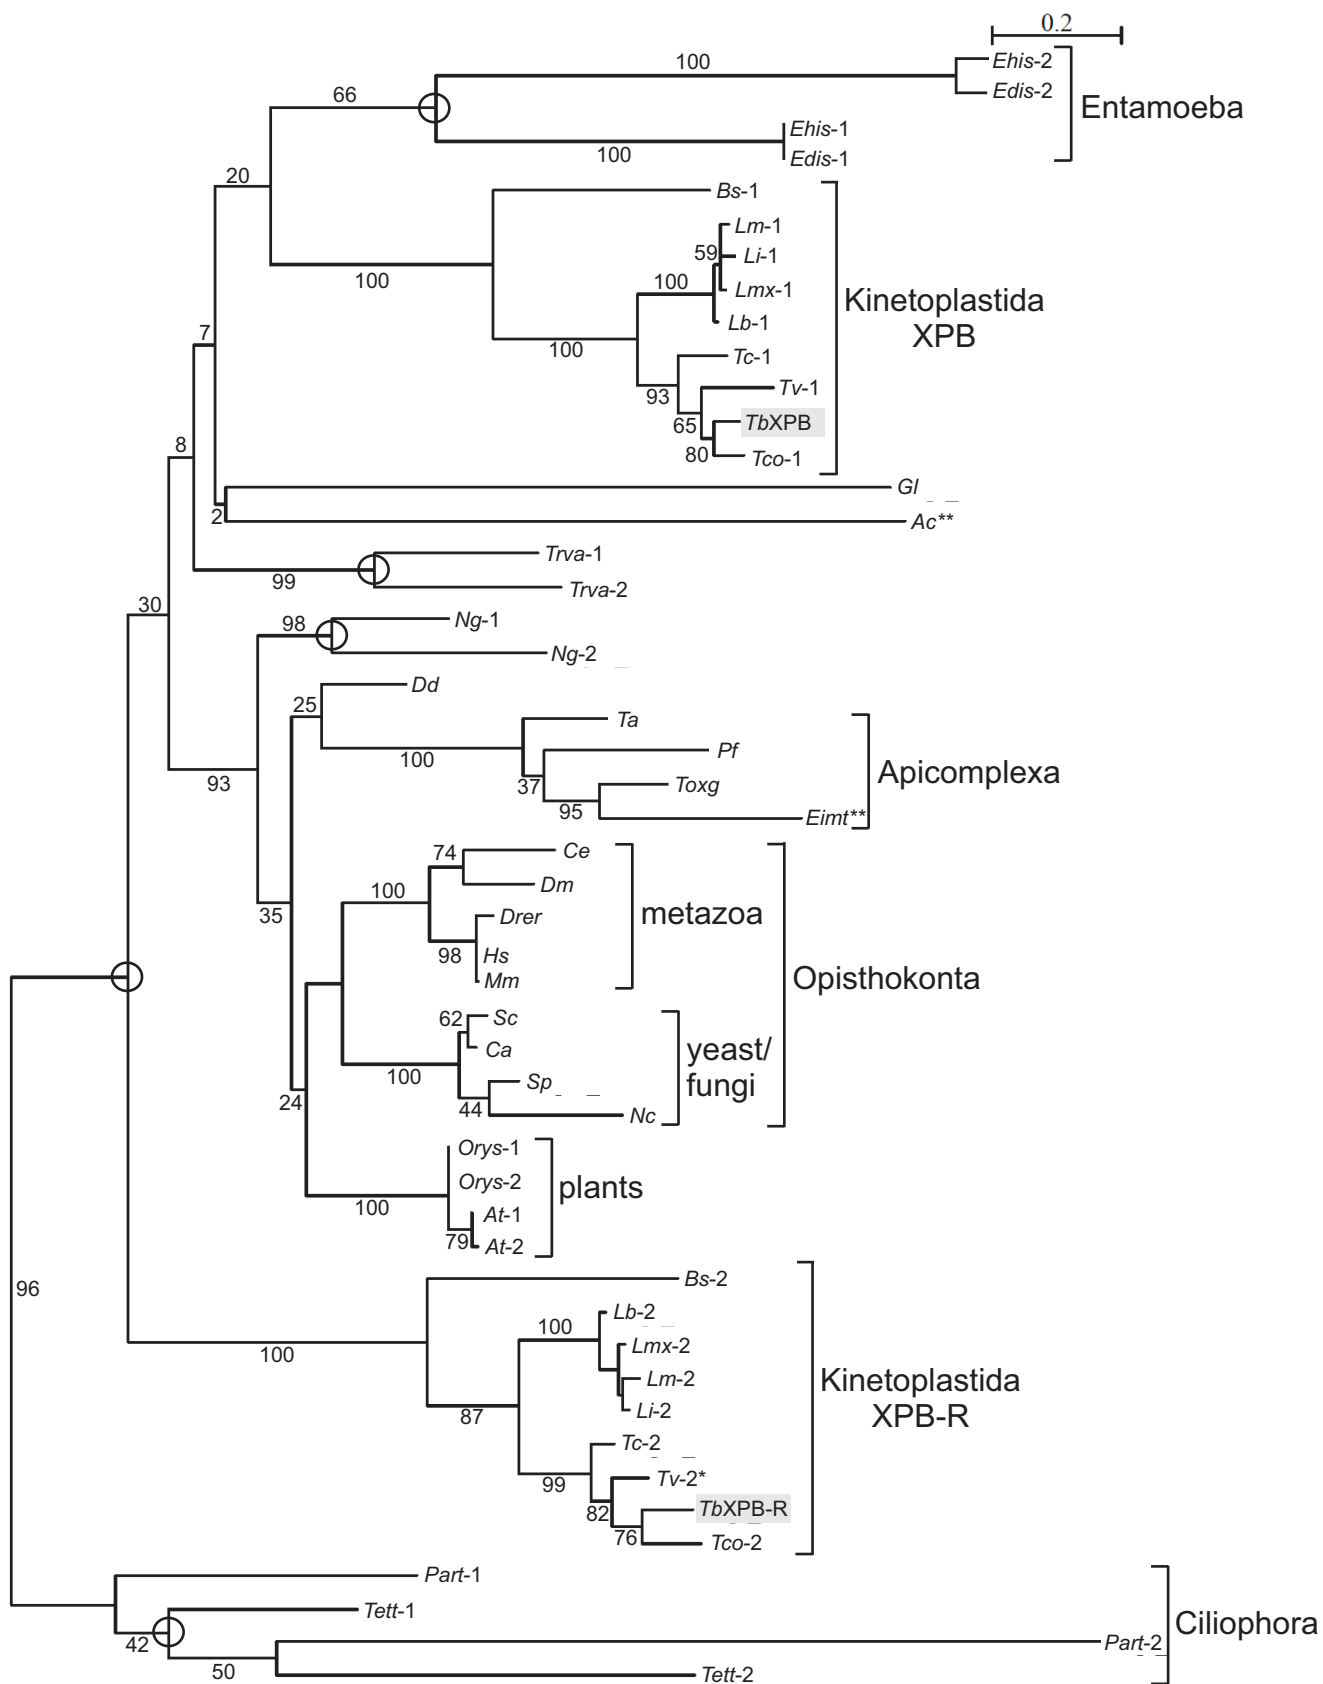



**Fig. S6.** Divergent *XPB* paralogs are present in several protistan taxa.

Multiple eukaryotic *XPB* amino acid sequences were aligned and phylogenetically analyzed using maximum likelihood. Bootstrap values were obtained by sampling a thousand replicates and are indicated as percentages. The scale bar indicates the number of amino acid substitutions per site. Open circles mark the splits of two divergent *XPB* paralogs within a taxon. If a species contained two *XPB* genes/sequences, the one with greater similarity to *T. brucei* *XPB* received the name affix 1 and the other sequence the affix 2. Accession numbers are specified in Fig. S1. *Ac*, *Acanthamoeba castellanii*; *At-1/At-2*, *Arabidopsis thaliana*; *Bs-1/Bs-2*, *Bodo saltans*; *Ca*, *Candida albicans*; *Ce*, *Caenorhabditis elegans*; *Dd*, *Dictyostelium discoideum*; *Dm*, *Drosophila melanogaster*; *Drer*, *Danio rerio*; *Eimt*, *Eimeria tenella*; *Gl*, *Giardia lamblia*; *Hs*, *Homo sapiens*; *Lb-1/Lb-2*, *Leishmania braziliensis*; *Li-1/Li-2*, *Leishmania infantum*; *Lm-1/Lm-2*, *Leishmania major*; *Lmx-1/Lmx-2*, *Leishmania mexicana*; *Mm*, *Mus musculus*; *Nc*, *Neurospora crassa*; *Ng-1/Ng-2*, *Naegleria gruberi*; *Orys-1/Orys-2*, *Oryza sativa*; *Part-1/Part-2*, *Paramecium tetraurelia*; *Pf*, *Plasmodium falciparum*; *Sc*, *Saccharomyces cerevisiae*; *Sp*, *Schizosaccharomyces pombe*; *Ta*, *Theileria annulata*; *Tb-1/Tb-R*, *Trypanosoma brucei*; *Tc-1/Tc-2*, *Trypanosoma cruzi*; *Tco-1/Tco-2*, *Trypanosoma congolense*; *Tett-1/Tett-2*, *Tetrahymena thermophila*; *Toxg*, *Toxoplasma gondii*; *Trva-1/Trva-2*, *Trichomonas vaginalis*; *Tv-1/Tv-2*, *Trypanosoma vivax*.

\* The *T. vivax* *XPB-2* gene appears to be a partial gene, missing sequence for ~220 C-terminal amino acids

\*\* The single *E. tenella* and *A. castellanii* *XPB* genes miss a large portion of the *XPB* N-terminus including the *XPB* domain, suggesting that the reading frames of these genes are incomplete.

#### *Method of Phylogenetic Analysis*

*XPB* amino acid sequences from 33 organisms representing the major eukaryotic supergroups (Dacks *et al.*, 2008) were aligned using the multiple sequence alignment tool MUSCLE at the EMBL European Bioinformatics Institute (<http://www.ebi.ac.uk/Tools/msa/muscle/>). The alignment was uploaded onto the graphical user interface Seaview (Gouy *et al.*, 2010); (<http://pbil.univ-lyon1.fr/software/seaview.html>) to drive the GBlocks program using the less stringent option for the selection of conserved sequence blocks that are likely to be aligned correctly and for the removal of poorly aligned positions (Talavera and Castresana, 2007). The best-fit evolution model for phylogenetic analysis was determined by using the ProtTest Server 2.4 (Abascal *et al.*, 2005); ([http://darwin.uvigo.es/software/prottest2\\_server.html](http://darwin.uvigo.es/software/prottest2_server.html)). A maximum likelihood tree was generated employing the LG empirical matrix (Le and Gascuel, 2008) with estimated invariable sites, substitution rate categories of 4, estimated gamma distribution and model equilibrium frequencies.

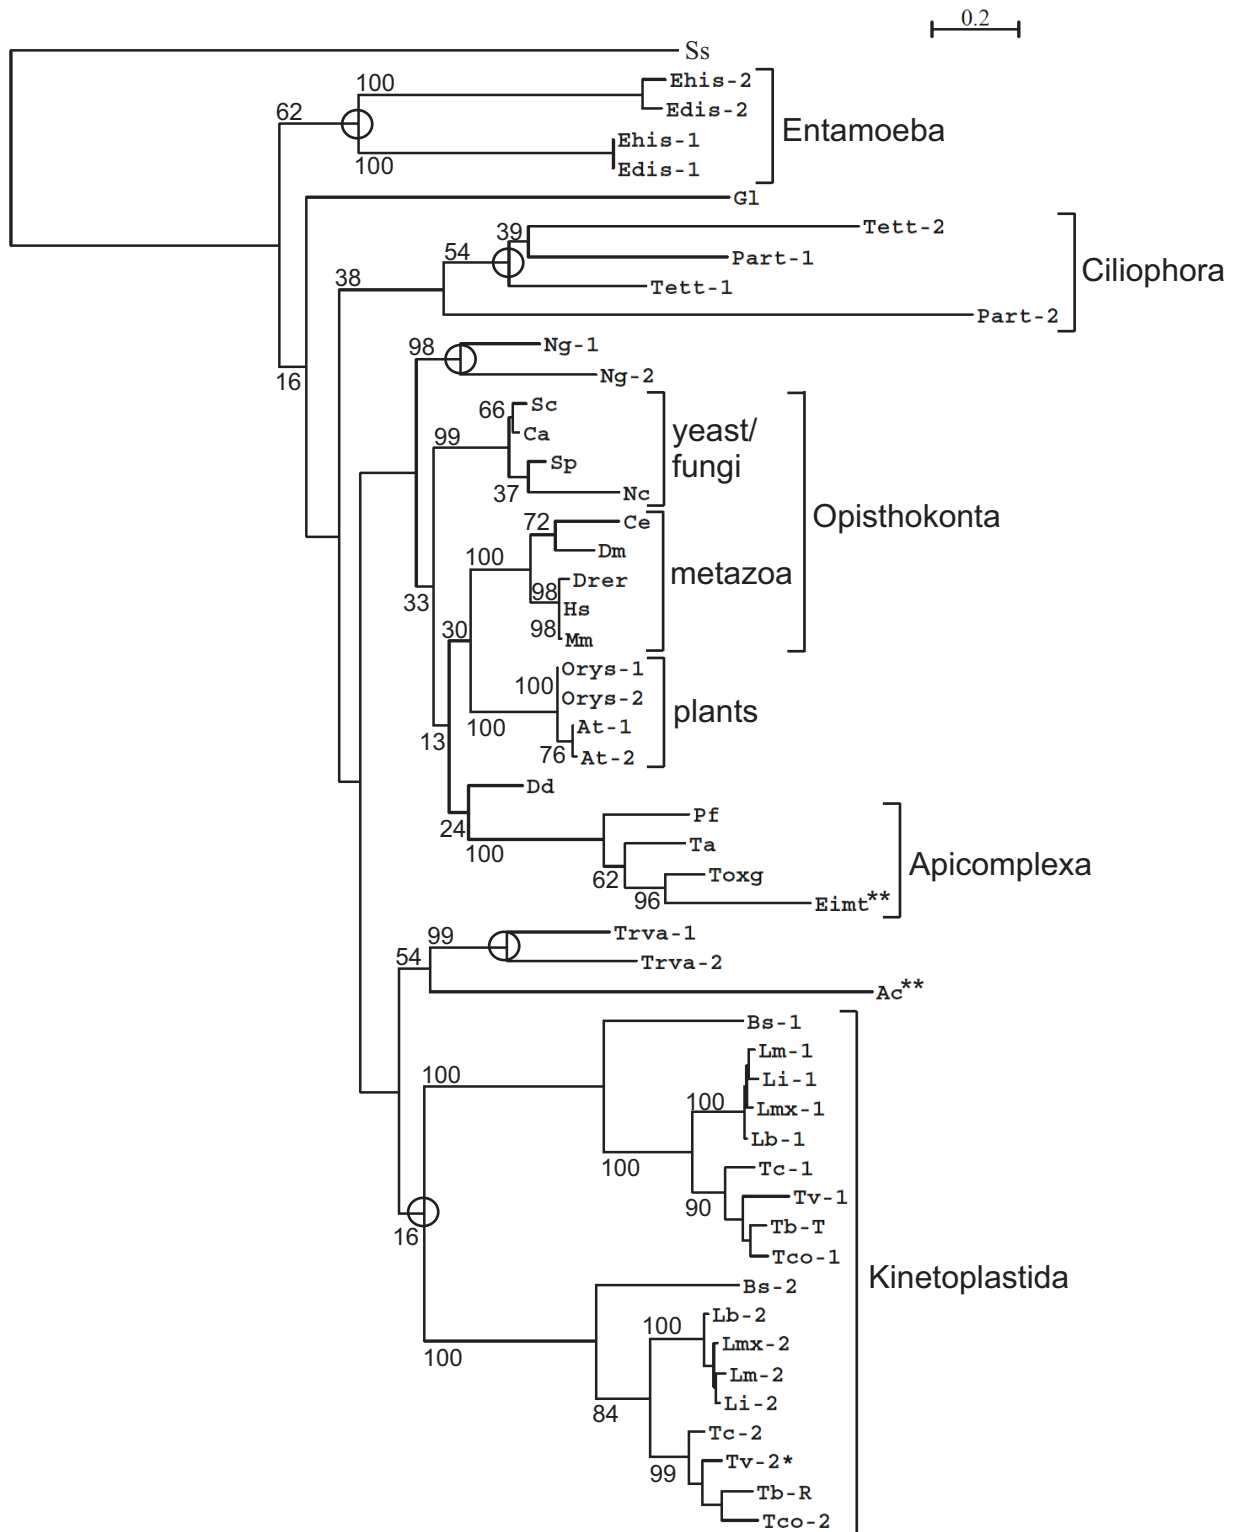

**Fig. S7.** XPB-derived phylogenetic tree with the archaeon *Sulfolobus solfataricus* as an outgroup

The phylogenetic analysis corresponds to that shown in figure 7 except that the XPB sequence from *Sulfolobus solfataricus* (Ss, accession number NP\_342443) was included.

**Table S1. Oligonucleotide used in this study**

| <b>pGene</b>                       | <b>Sequence</b>                                                                                                                                                         | <b>Usage</b>                                                                                                                                                                                                                                                                                                                              |
|------------------------------------|-------------------------------------------------------------------------------------------------------------------------------------------------------------------------|-------------------------------------------------------------------------------------------------------------------------------------------------------------------------------------------------------------------------------------------------------------------------------------------------------------------------------------------|
| <b>XPB-R</b>                       | 5'-GGAGTGGAAGCTGCGAGGCCAGTAGTG-3' /<br>5'-CCAAATCCACCTGAATACGGCGACG-3'<br><br>5'-TAAGGGCCCAGCACACCGAACTGCATTCCCTCG-3' /<br>5'-TAACGGCCGCGATGACGTTGTCTATCATGAGAG<br>T-3' | Sense/antisense oligonucleotides that hybridize in the 5' and 3' XPB-R gene flanks, respectively; used to analyze correct integration of transfected DNA constructs that replace the wild-type <i>XPB-R</i> alleles.<br>Sense/antisense oligonucleotides that hybridize within the coding region of XPB-R; used for RT-PCR of XPB-R mRNA. |
| <b>U2A'</b>                        | 5'-TAGGGCCCTCCAAAACGGCAGTGCCGATACTG<br>C-3' / 5'-TACGGCCGTGATGTGCGAGTCTTCTTTGTC<br>CCTTTAGAAGC-3'                                                                       | Sense/antisense oligonucleotides that hybridize within the coding region of U2A'; used for RT-PCR of U2A' mRNA.                                                                                                                                                                                                                           |
| <b>SL RNA</b>                      | 5'-CTACCGACACATTTCTGGC-3' / 5'-GGTATGAGAA<br>GCTCCCAGTAGCAGC-3'<br><br>5'-ATGGCTTATACGTGCTCGTTTCTCC-3' / 5'-CACAT<br>ATAGGCGCTTTAAAGTCTGCT-3'                           | Sense/antisense oligonucleotides that hybridize in the <i>SLRNA</i> promoter region; used for PCR / qPCR amplifications in ChIP experiments.<br>Sense/antisense oligonucleotides that hybridize in the <i>SLRNA</i> intergenic region; used for PCR / qPCR amplifications in ChIP experiments.                                            |
| <b><math>\alpha</math>-Tubulin</b> | 5'-GTGCATTGAACGTGGATCTG-3' / 5'-GCCTACCAC<br>GAGCAACTCTC-3'                                                                                                             | Sense/antisense oligonucleotides that hybridize within the coding region of $\alpha$ -tubulin; used for PCR / qPCR amplifications in ChIP experiments.                                                                                                                                                                                    |
| <b>p52</b>                         | 5'-TAGGGCCCCGAGCCCCTTCAACAACAGTGG-3' /<br>5'- TACGGCCGATCCGGAGTAATGAAATTGGAC-3'                                                                                         | Sense/antisense oligonucleotides that hybridize within the coding region of p52; used for RT-PCR of p52 mRNA.                                                                                                                                                                                                                             |

## Supplemental References

- Abascal,F., Zardoya,R., and Posada,D. (2005) ProtTest: selection of best-fit models of protein evolution. *Bioinformatics* **21**: 2104-2105.
- Dacks,J.B., Walker,G., and Field,M.C. (2008) Implications of the new eukaryotic systematics for parasitologists. *Parasitol Int* **57**: 97-104.
- Gouy,M., Guindon,S., and Gascuel,O. (2010) SeaView version 4: A multiplatform graphical user interface for sequence alignment and phylogenetic tree building. *Mol Biol Evol* **27**: 221-224.
- Le,S.Q., and Gascuel,O. (2008) An improved general amino acid replacement matrix. *Mol Biol Evol* **25**: 1307-1320.
- Sievers,F., Wilm,A., Dineen,D., Gibson,T.J., Karplus,K., Li,W. *et al.* (2011) Fast, scalable generation of high-quality protein multiple sequence alignments using Clustal Omega. *Mol Syst Biol* **7**: 539.
- Talavera,G., and Castresana,J. (2007) Improvement of phylogenies after removing divergent and ambiguously aligned blocks from protein sequence alignments. *Syst Biol* **56**: 564-577.
